# Supplementary material for: INSIHGT: an accessible multi-scale, multi-modal 3D spatial biology platform
Source: Springer Nature journal article supplement (doi:10.1038/s41467-024-55248-0), 2024-12-30
Supplement: MOESM1 [file 41467_2024_55248_MOESM1_ESM.pdf]

## Supplementary Information

# INSIHGT: An accessible multi-scale, multi-modal 3D spatial biology platform

## Supplementary Texts

### Weakly coordinating superchaotropes as non-denaturing protein solubilizers

For proteins, the significant role of intramolecular interactions in intermolecular interactions complicates the picture. Ideally, intermolecular interactions were selectively disturbed for solubilization, with minimal disturbance on intramolecular interactions to prevent denaturation. We reasoned that if the interactions between the native solvent (i.e., water) and proteins are promoted, the intramolecular forces (e.g., hydrophobic interactions) of proteins that evolved in an aqueous environment will help maintain their current folded state. This contrasts with agents that have significant affinities towards the proteins, which may compete against the intramolecular forces and disrupt their folding, such as with detergents <sup>1</sup> and strong hydrogen-bonding agents like urea <sup>2</sup>. Hence, an ideal protein solubilizer is water soluble yet poorly coordinating with both water and proteins. The ideal weakly-coordinating superchaotropes have low charge-to-volume ratios and lack hydrophobic groups to avoid affinities towards protein hydrophobic surfaces. We thus screened the literature for counter anions used in the isolation of extremely electrophilic species for crystallography <sup>3</sup> or as conjugate bases of superacids, which include perchlorate, perrhenate, and dodecaborates.

### Physicochemical properties of *closo*-dodecahydrododecaborate

The *closo*-dodecahydrododecaborate  $[B_{12}H_{12}]^{2-}$  was discovered in the 1950s and stands out as a remarkably stable member of boron cluster compounds and boron hydrides. It can withstand sustained dry heating, strong acids and alkalis, and diverse reactive organic or inorganic chemicals. Its chemical inertness has been attributed to the 3D aromaticity of the ion - a Hückel's rule generalization in planar aromatic compounds. Apart from chemical inertness,  $[B_{12}H_{12}]^{2-}$  is also poorly coordinating, exemplified by the super-acidic character of its Brønsted acid  $H_2B_{12}H_{12}$  ( $pK_a = 28$ ) <sup>4</sup> and perhaps by the stabilization of the conjugate base by delocalizing the two electrons over a large surface area. The combined weak ionic and poorly coordinating properties lead to easy solubilization of the  $[B_{12}H_{12}]^{2-}$  ion in diverse solvents, lending the proposal for it to be used for nuclear waste treatment by extracting charged ions into water-immiscible organic solvents. The chemical and coordinative inertness of  $[B_{12}H_{12}]^{2-}$  is also directly related to its biological inertness, with an oral lethal dose ( $LD_{50}$ ) for rats at  $> 7,500$  mg/kg. Hence, the proposed biological applications for  $[B_{12}H_{12}]^{2-}$  and its  $^{10}B$  isotopic derivatives were largely related to boron neutron capture therapy (BNCT) *in vivo*. The utility of  $[B_{12}H_{12}]^{2-}$  *in vitro* has been scarcely explored. The available solution characteristics of  $[B_{12}H_{12}]^{2-}$  is summarized in **Supplementary Table 5**.

### Interactions of $[B_{12}H_{12}]^{2-}$ with other molecular species

The pair correlation function of  $[\text{B}_{12}\text{H}_{12}]^{2-}$  ion in water has been obtained by simulation. It showed concentric rings of water molecules on top of the hydrogen atoms, with an average number of water molecules forming  $\approx 10$  bridging  $\text{O}-\text{H}\cdots\text{H}-\text{B}$  dihydrogen bonds (DHB) <sup>5</sup>, with a simulated DHB length of  $1.76 \text{ \AA}$  <sup>6</sup> with an estimated bond strength of  $7.15 \text{ kcal mol}^{-1}$  <sup>7</sup> (*ca.*  $\text{O}-\text{H}\cdots\text{O}$  hydrogen bond length in water:  $1.97 \text{ \AA}$ , bond strength  $5.0 \text{ kcal mol}^{-1}$ ). Simulated translational diffusion coefficients of the  $[\text{B}_{12}\text{H}_{12}]^{2-}$  ion in water is  $(1.8 \pm 0.2) \times 10^{-9} \text{ m}^2 \text{ s}^{-1}$ .

Apart from forming DHBs,  $[\text{B}_{12}\text{H}_{12}]^{2-}$  do have some coordinating activity as per evidence obtained in crystalline solid state <sup>8</sup> and has been shown to interact with adenine directly in aqueous solutions. <sup>9</sup>

Interestingly, at concentrations up to  $1.5 \text{ mM}$ ,  $[\text{B}_{12}\text{H}_{12}]^{2-}$  does not disrupt the structure of bovine serum albumin (BSA) at all in  $0.1 \text{ M NaHCO}_3$ , does not show any significant interactions with BSA or affect the hydrodynamic radii of BSA even at near 1,000-fold molar excess. It also did not affect the thermal denaturing behaviour of BSA. <sup>10</sup>

## INSIHGT Protocol

This protocol describes the INSIHGT process for staining fixed or permeabilized tissues.

### Materials

|                                                        |                                                                            |
|--------------------------------------------------------|----------------------------------------------------------------------------|
| PBSN (1× PBS with 0.02% w/v $\text{NaN}_3$ )           | Sodium dodecahydrododecaborate ( $\text{Na}_2\text{B}_{12}\text{H}_{12}$ ) |
| Methanol                                               | 2-hydroxypropyl- $\gamma$ -cyclodextrin (2HP $\gamma$ CD)                  |
| Dichloromethane                                        | Nucleic acid probe (optional)                                              |
| Sodium sulphite ( $\text{Na}_2\text{SO}_3$ , optional) | Sulfobutylether- $\beta$ -cyclodextrin (SBE $\beta$ CD, optional)          |

### Buffers/Solutions

INSIHGT buffer A (2×): 0.5M  $\text{Na}_2\text{B}_{12}\text{H}_{12}$  in PBSN

INSIHGT buffer B (1×): 0.25M 2HP $\gamma$ CD in PBSN

INSIHGT buffer C (1×): 0.25M SBE $\beta$ CD in PBSN

### Procedure overview

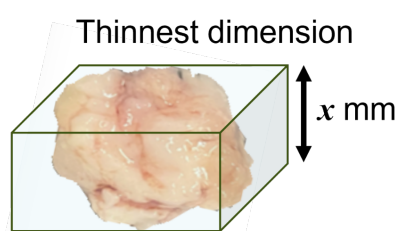

Tissue-to-image time:  
 $\approx 3 + 0.3x$  days

Starting antibody amount:  
 $10 \mu\text{g}$  per  $1\text{cm}^3$

Min. staining time:  
 $t = (0.5x^2 + 2x + 2)$  hours

Min. post-incubation time:  
 $s = (0.75x + 1)$  hours

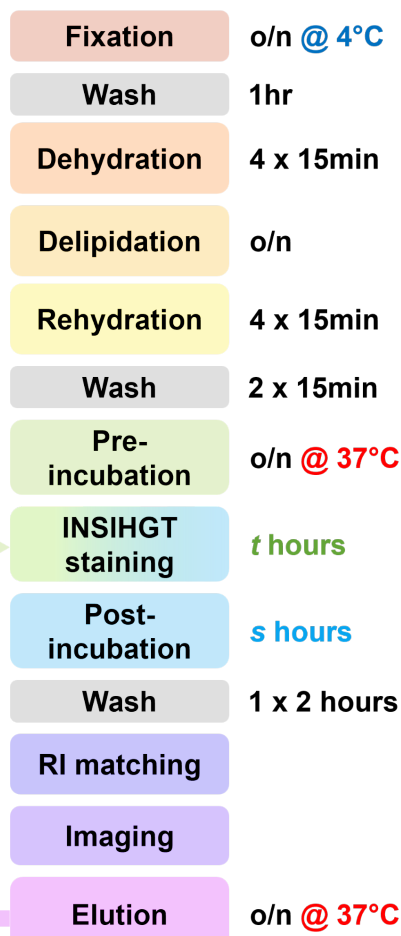

## Procedure

The procedure below is illustrated for a 1 cm<sup>3</sup> tissue sample using BABB clearing but can be scaled as needed.

0. **Fixation:** Fix tissue overnight at 4°C with formaldehyde, glutaraldehyde or SHIELD-fixation. Wash in 5 ml PBSN for 1 hour at room temperature (r.t.) with shaking. For glutaraldehyde or SHIELD-fixation, quenching should be done appropriately.

1. **Dehydrate** by shaking incubation in 5 ml 50% v/v methanol/water, then 5 ml 100% methanol repeated 3 times, 15 min with shaking at r.t. for each step.

2. **Delipidate** by shaking incubation in 5 ml 2:1 v/v mixture of dichloromethane/methanol overnight at r.t. Use a glass or polypropylene container (e.g. microcentrifuge tubes), in a well-ventilated hood with adequate shaking.

3. **Rehydration:** Repeat the dehydration steps in reverse order, then 2 × 15 min washes in PBSN.

4. **Pre-Incubation:** Incubate in 2 ml 1× INSIHGT buffer A at 37°C overnight with shaking.

5. **Prepare nucleic acid probe (optional):** Prepare 200 nmol of the probe by mixing it with INSIHGT buffer C in a 1:1 v/v ratio.

### 6. INSIHGT Staining:

- a. Place the tissue in a container that fits its size well.
- b. Add enough 2× INSIHGT buffer A to around half-cover the tissue.
- c. Add the desired amount of primary antibodies (start with 10µg each).
- d. Add the prepared nucleic acid probe in INSIHGT buffer C (if desired).
- e. Add corresponding fluorophore-labeled secondary antibody Fab fragments or nanobodies (in the same µg amount as the primary antibody used), or lectins if desired.
- f. Add PBSN to make the final concentration of INSIHGT buffer A to 1x. The volume required will be equal to the volume added in step 6a - (total volume added in step 6c, 6d, and 6e).
- g. Top up with 1x INSIHGT buffer A to just cover the entire tissue.
- h. Incubate at r.t. for 3 days (or *t* hours, see below) with shaking. Protect from light.

7. **Post-incubation:** Incubate the stained tissue in 3 ml INSIHGT buffer B at r.t. overnight (or *s* hours, see below) with shaking. Place the tube horizontally to ensure adequate mixing.

8. **Wash:** Wash in 5 ml PBSN three times for 2 hours each at r.t., shaken horizontally.

9. **Refractive index matching (optional):** Example for BABB clearing:

- Repeat the dehydration steps.
- Prepare BABB: 1:2 v/v mix of benzyl alcohol / benzyl benzoate.
- Place tissue in 5ml BABB at r.t. overnight with shaking. Refresh BABB until tissue is clear.



10. **Imaging:** Confocal, light-sheet and two-photon microscopies are all compatible.

11. **Stripping** (optional): Strip tissue in 2 ml 1× INSIHGT buffer A + 0.1 M Na<sub>2</sub>SO<sub>3</sub> at 37°C overnight with shaking. Wash twice with 2 ml 1× INSIHGT buffer at 37°C for 2 hours each.

12. **Repeat staining** (optional): Proceed to step 6 for the next round of staining.

#### Notes

- All incubation periods can be extended up to one month without harm.
- Tissues delipidated with methods other than CH<sub>2</sub>Cl<sub>2</sub>/Methanol are acceptable, except if the buffer contains Triton X-100 or triethylamine. Tween-20 is compatible.
- Test pretreatment buffer compatibility with INSIHGT. Mix 100μl of the buffer with 2× INSIHGT buffer A in a 1:1 ratio. If precipitation occurs, test each buffer component individually and exclude any that cause precipitation from your modified buffer.
- Avoid contact between 100% dichloromethane and plastics (except with polypropylene or PTFE tips or Eppendorf tubes). It dissolves plastics and makes the solution cloudy.
- The minimum staining time ( $t$  hours) in step 8 depends on the thinnest dimension ( $x$ , in mm) of the tissue. Calculate  $t$  as  $0.5x^2 + 2x + 2$ . The estimated minimum staining duration is employed throughout the manuscript to achieve protocol standardization.
- The minimum post-incubation time ( $s$  hours) in step 9 is  $s = 0.75x + 1$ . The estimated minimum post-incubation duration is employed throughout the manuscript to achieve protocol standardization.
- If staining is uniform, staining time can be reduced. Conversely, if penetration is inhomogeneous, ensure adequate amounts of antibodies have been added, and then extend the staining time by 1.5×. There is no need to adjust post-staining incubation and washing.
- Increasing antibody concentration in the staining solution by 1.5× can also enhance penetration homogeneity. Conversely, if staining is uniform and signal-to-noise is satisfactory, antibody concentration can be reduced.
- If using fluorophore-labeled whole IgG secondary antibodies, F(ab')<sub>2</sub> fragments or multivalent streptavidins, perform steps 6–8 with primary antibodies only, then repeat for the secondary/tertiary agents starting from step 4. There is no need to post-fix primary antibodies.
- We recommend using INSIHGT with solvent-based tissue clearing (such as BABB, DBE, or ethyl cinnamate (ECi)) as they provide the fastest tissue delipidation options. Note that triethylamine should be replaced by triethanolamine in ECi clearing to avoid residual triethylamine precipitating with [B<sub>12</sub>H<sub>12</sub>]<sup>2-</sup>. Similarly, for aqueous-based methods, any use of Triton X-100 should be replaced by other detergents that do not precipitate with [B<sub>12</sub>H<sub>12</sub>]<sup>2-</sup>. Please refer to the above points on how to test buffer compatibility.
- To visualize endogenous fluorescence, staining them with anti-fluorescent protein

antibodies is the best solution. Alternatively, one can attempt clearing with (ECi)<sup>61,62</sup>, with triethanolamine replacing triethylamine as pH adjusting agent, or dibenzyl ether clearing after tetrahydrofuran (THF) dehydration<sup>63</sup>. SHIELD-based protection with aqueous-based refractive index matching using PROTOS (refractive index matching solution; LifeCanvas Technologies, Cambridge, MA, United States)<sup>64</sup> or OPTIClear<sup>65</sup> can also be used after omitting Triton X-100 in all the buffers.

- After staining, the sample can be stored in PBSN at 4°C or in BABB at r.t. Indefinitely.
- All equations for the minimum staining time and post-incubation time are empirically determined and shall be applicable to various tissue types, at times depending on the antigen densities, as discussed above. We suggest for extremely dense antigens or labelling (e.g., lectins, ubiquitous and highly expressed antigens), the user should optimize the staining duration and the amount of probe added using a bulk-then-cut-staining assessment as with our benchmarking experimental design (**Supplementary Fig. 4a**).

## Graphical summary of INSIHGT protocol

# INSIHGT GRAPHICAL PROTOCOL

Illustrated for  $\leq 1\text{cm}^3$  tissues or whole mouse brains

► applicable to formaldehyde-, glutaraldehyde-, or polyepoxide-fixed tissues

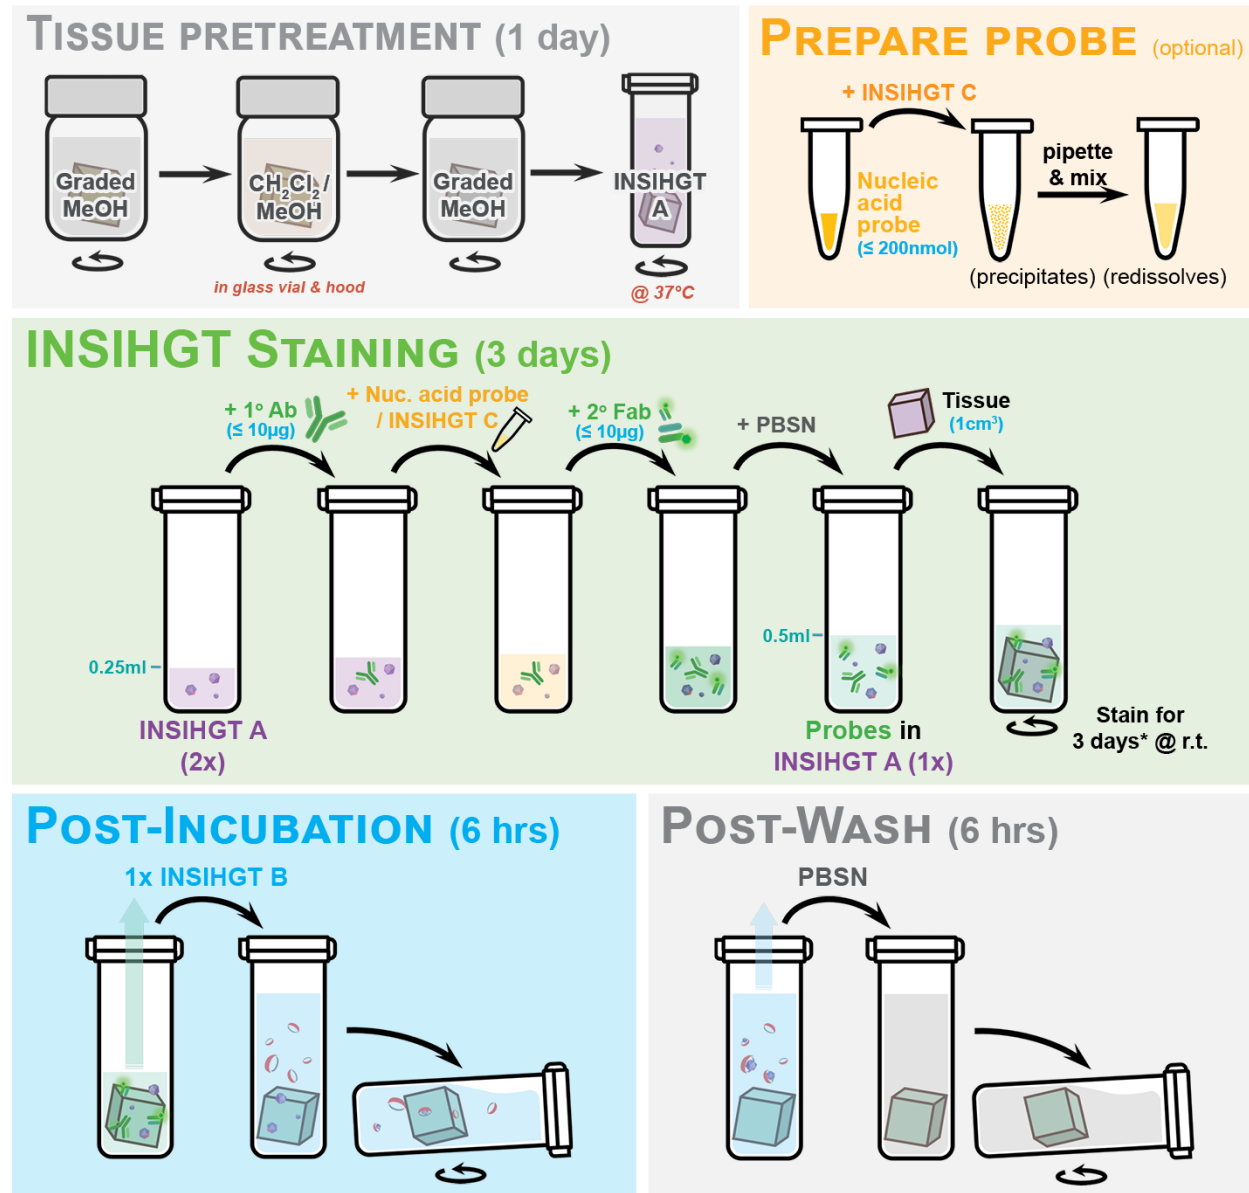

\* Can reduce the staining time or amount of antibodies used if penetration homogeneity is ideal; conversely, increase the staining time, or antibody concentration, or both if it is not.

The above image was provided by Illumos Limited and reproduced here with permission.

## Supplementary Figures

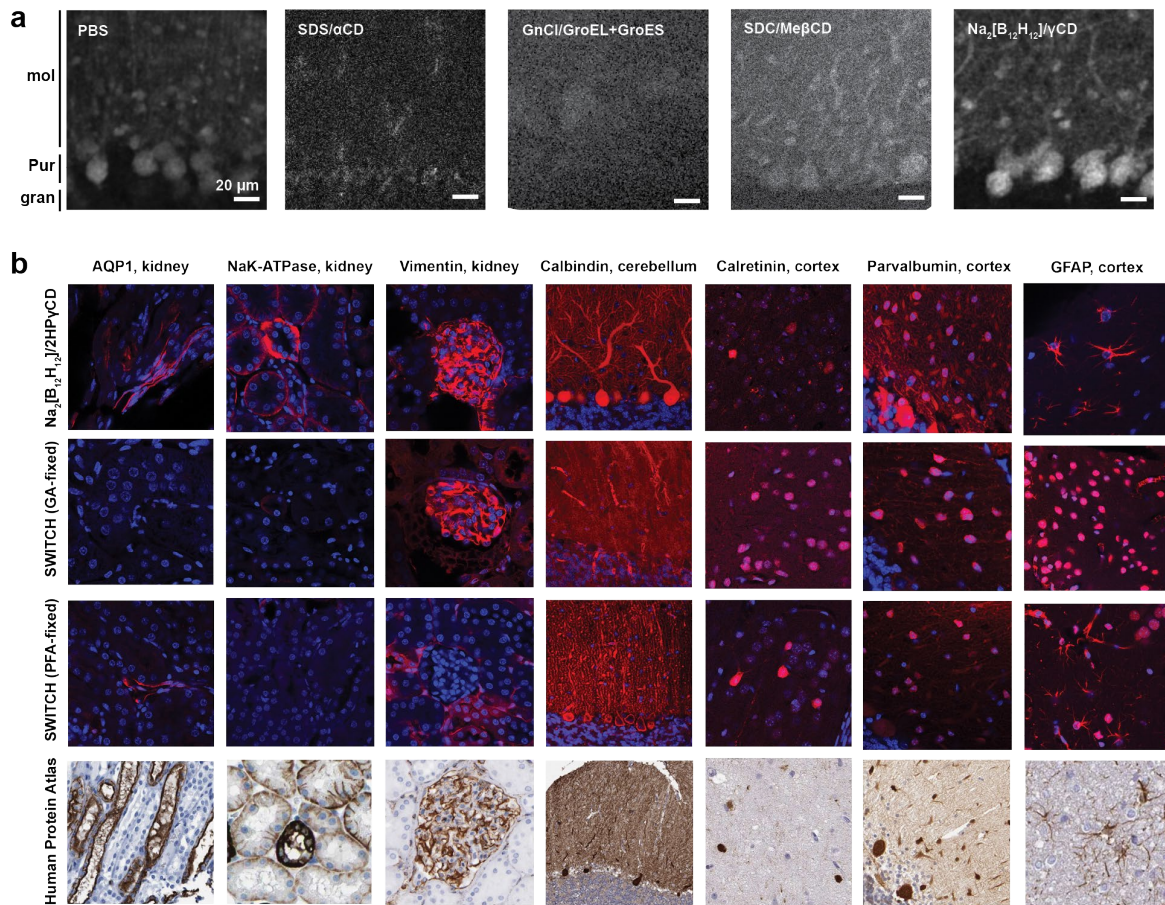

**Supplementary Figure 1. Comparison of staining techniques in biological tissues.** **a** Comparison of proposed antibody-antigen inhibition strategies and their recovery approaches. All stainings were performed in mouse cerebellum tissue for PVALB, with antibodies first co-incubated in a buffer containing an antibody-antigen interaction inhibitor followed by a measure to reinstate antibody-antigen binding. The samples were then cut midway on the longest axis and imaged at the cut face to evaluate the bulk-staining penetration depth and uniformity. PBS: staining for PVALB done in PBS as a control. SDS/αCD: inhibition with 10mM SDS, followed by its complexation with alpha-cyclodextrin (αCD) for recovery, GdnCl/GroEL+GroES: inhibition with 6M guanidinium chloride (GdnCl) followed by in situ refolding with GroEL and GroES molecular chaperones, SDC/MeβCD: inhibition with sodium deoxycholate (SDC) followed by its complexation with random methylated beta-cyclodextrin (MeβCD) for recovery, Na<sub>2</sub>[B<sub>12</sub>H<sub>12</sub>]-γCD: inhibition with 0.125M sodium dodecahydro-closo-dodecaborate (Na<sub>2</sub>[B<sub>12</sub>H<sub>12</sub>]) followed by its complexation with gamma-cyclodextrin (γCD) for recovery. Abbreviations: mol: molecular layer, pur: Purkinje layer, gran: granular layer. **b** Broader antibody compatibility and more specific staining was observed with the use of Na<sub>2</sub>[B<sub>12</sub>H<sub>12</sub>]-2HPyCD system with conventional paraformaldehyde fixation (upper row), compared with the SWITCH-labelling method reported by Murray *et al*<sup>11</sup>, regardless of whether the tissue was fixed as described using glutaraldehyde (GA-fixed) or paraformaldehyde (PFA-fixed, i.e., no SWITCH-fixation employed). Lower row: Human tissue immunostaining patterns from the Human Protein Atlas for comparison. DAPI staining for nuclei in blue, and antibody staining in red.

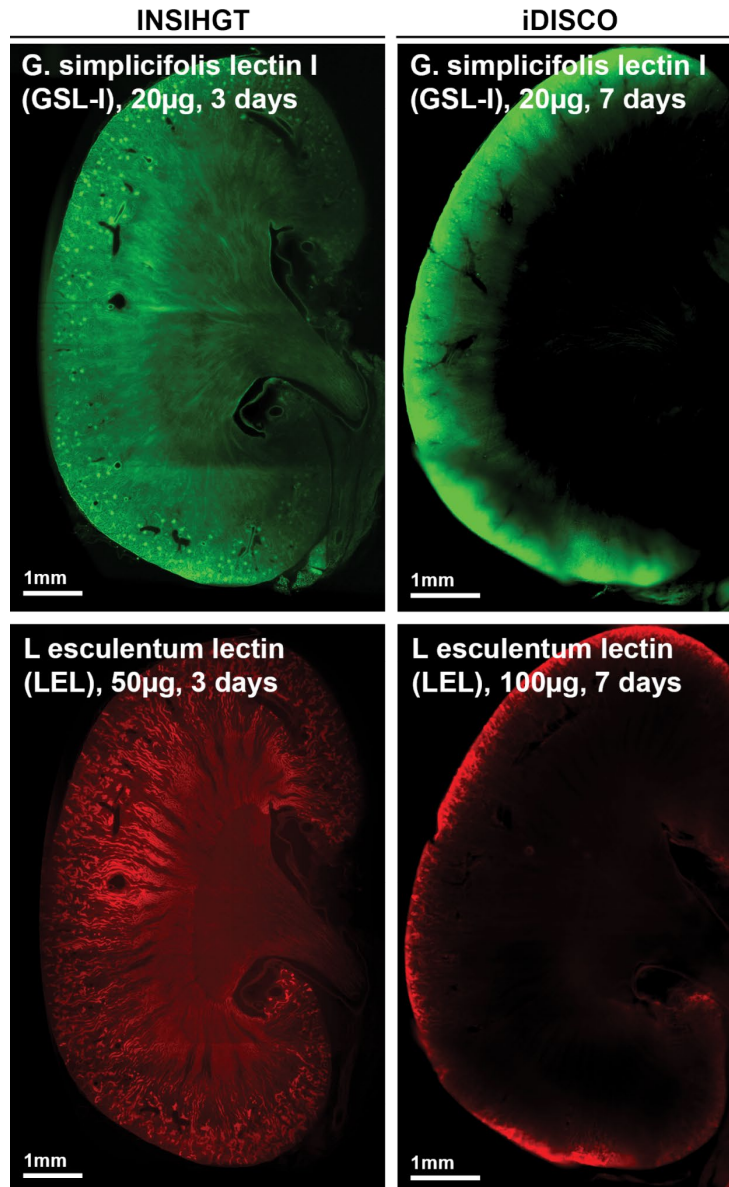

**Supplementary Figure 2. Comparison of lectin staining results between INSIHGT and iDISCO.** Lectin staining often results in a significant rimming pattern where only superficial layers are stained, as demonstrated via iDISCO staining of mouse kidney with GSL-I and LEL.

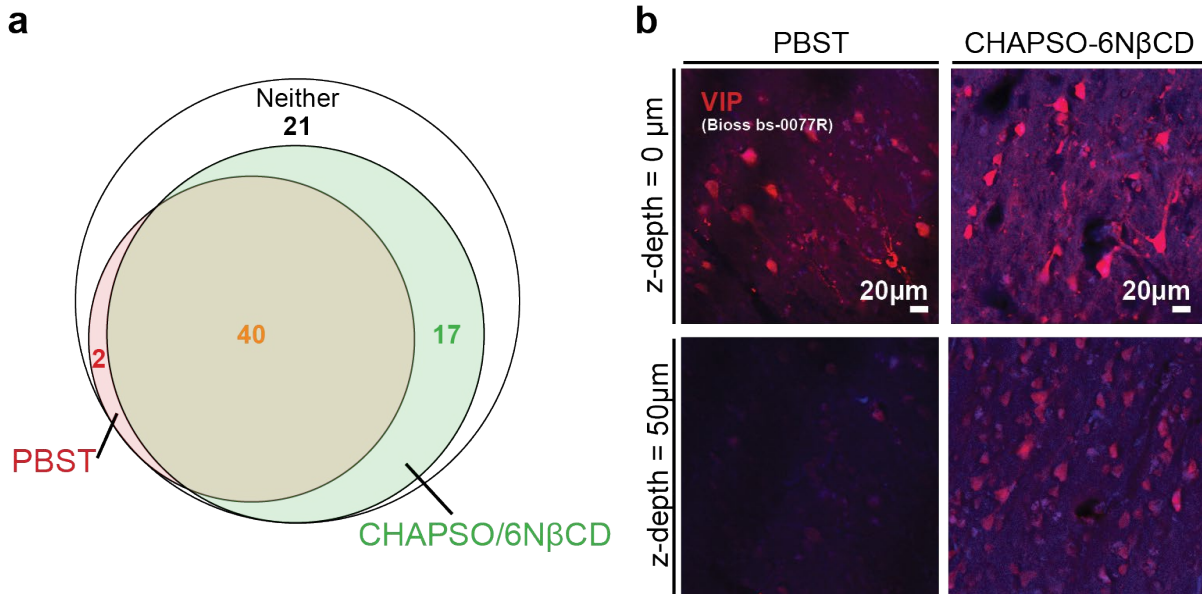

**Supplementary Figure 3. Efficacy of CHAPSO/6βCD host-guest system in antibody penetration and staining depth in tissues.** **a** The use of an optimized artificial chaperone host-guest system, CHAPSO/6NβCD, is compatible with 57 out of 80 validated commercial primary antibodies on human cancer tissue, human brain tissue, mouse kidney tissue and mouse brain tissue, compared to the use of PBS with 1% Triton X-100 (PBST) as the staining buffer. **b** Examples in the head-to-head staining penetration comparison using human brain tissue. DAPI signals were colored in blue, while antibody signals were colored in red.



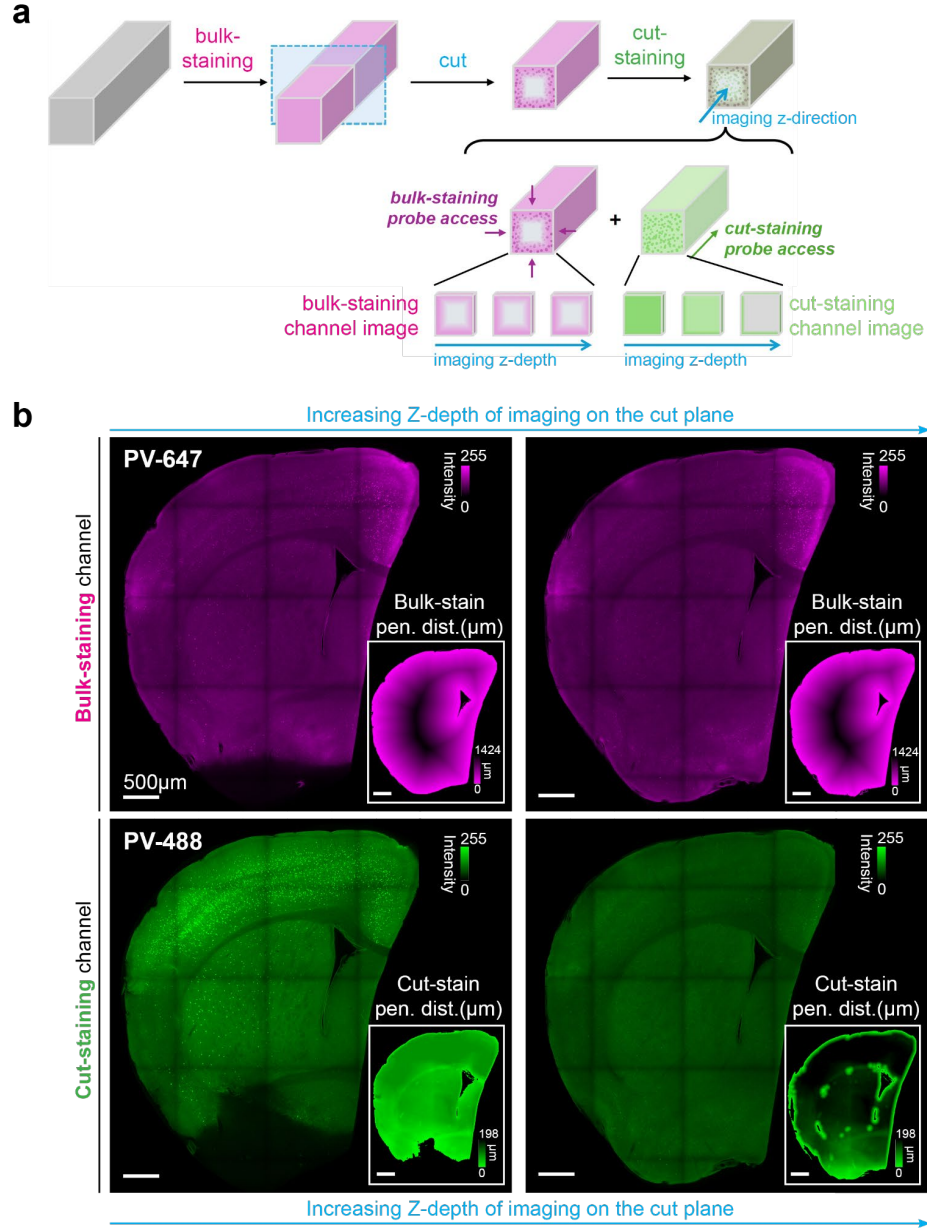

**Supplementary Figure 4. Evaluating deep tissue staining methods via bulk and cut staining.** **a** Benchmarking Experiment Design and Principle Illustration. A tissue block (grey) is first stained with the benchmarked method for a marker of choice (magenta, bulk staining). The stained tissue is then cut and restained under conventional staining conditions (e.g., PBS with 0.1% Tween 20) for the identical marker with a fluorophore with non-overlapping spectrum as the previous step (green, cut staining). The double-stained tissue is then imaged on the cut plane, where the comparison between the bulk-staining channel images (benchmarking method) and the cut-staining channel images (expected staining pattern) shall demonstrate the efficacy of the benchmarked staining method. In the illustration, the benchmarked method (magenta) shows a rimming pattern with failure to reproduce the pattern in cut-staining (green), indicating limited probe penetration. **b** Typical imaging results from a sample in the benchmarking experiment. The bulk-staining was conducted before tissue cutting, so the bulk-staining intensities (upper row) and their corresponding calculated penetration lengths (insets of upper row) are relatively invariant at the same z-depth of imaging (arranged in columns). Conversely, cut-staining was performed after tissue cutting, and antibodies could penetrate through the cut surface, which corresponds to the imaging plane, displayed in the xy-plane here (lower row). The penetration distance was irregular and inhomogeneous due to minor tissue curvatures and irregular tissue texture, and areas of lower penetration distances due to vasculatures. These factors were taken into account during the quantification of cut-staining penetration depth (insets of lower row).

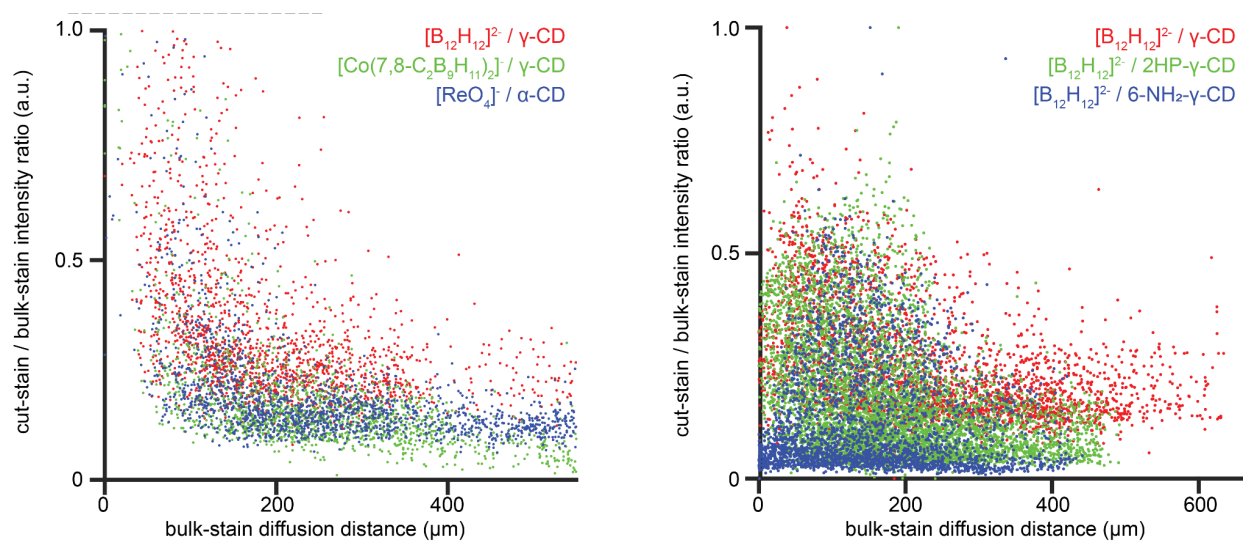

**Supplementary Figure 5.** Evaluation of different weakly coordinating superchaotropes (left panel) and  $\gamma$ -cyclodextrin derivatives (right panel) both at 0.1M concentration using the benchmarking experimental pipeline as described previously<sup>12,13</sup>.



**a****Bulk- then Cut-PVALB staining**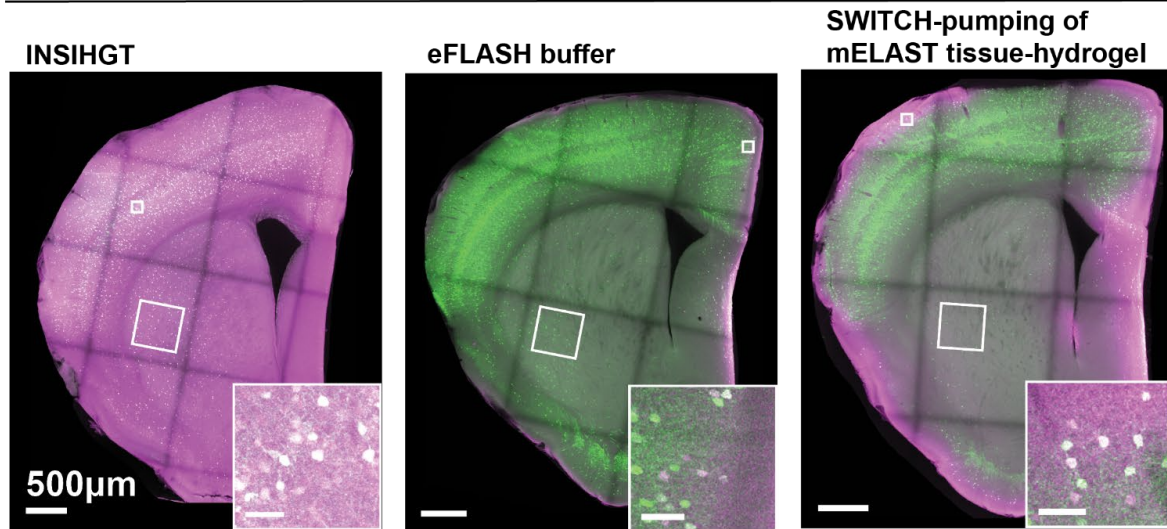**b**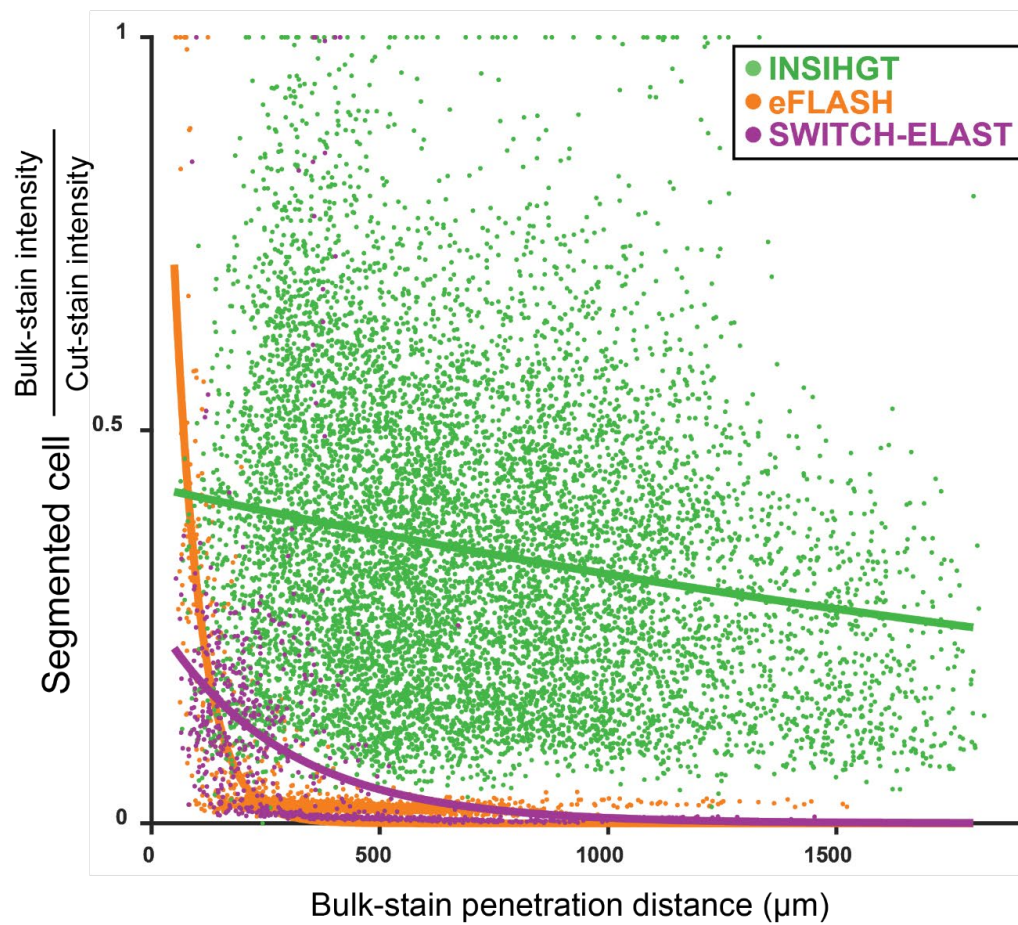

**Supplementary Figure 6. Performance Comparison of INSIHGT with eFLASH and SWITCH.** **a** Comparison of INSIHGT against binding kinetics modulatory buffers in eFLASH and SWITCH-pumping of mELAST tissue hydrogel buffer. Panel of INSIHGT is the same as Fig 2b. **b** Quantification of bulk:cut-staining signal ratio against penetration distance for segmented cells in the same procedures described in Fig. 2b.

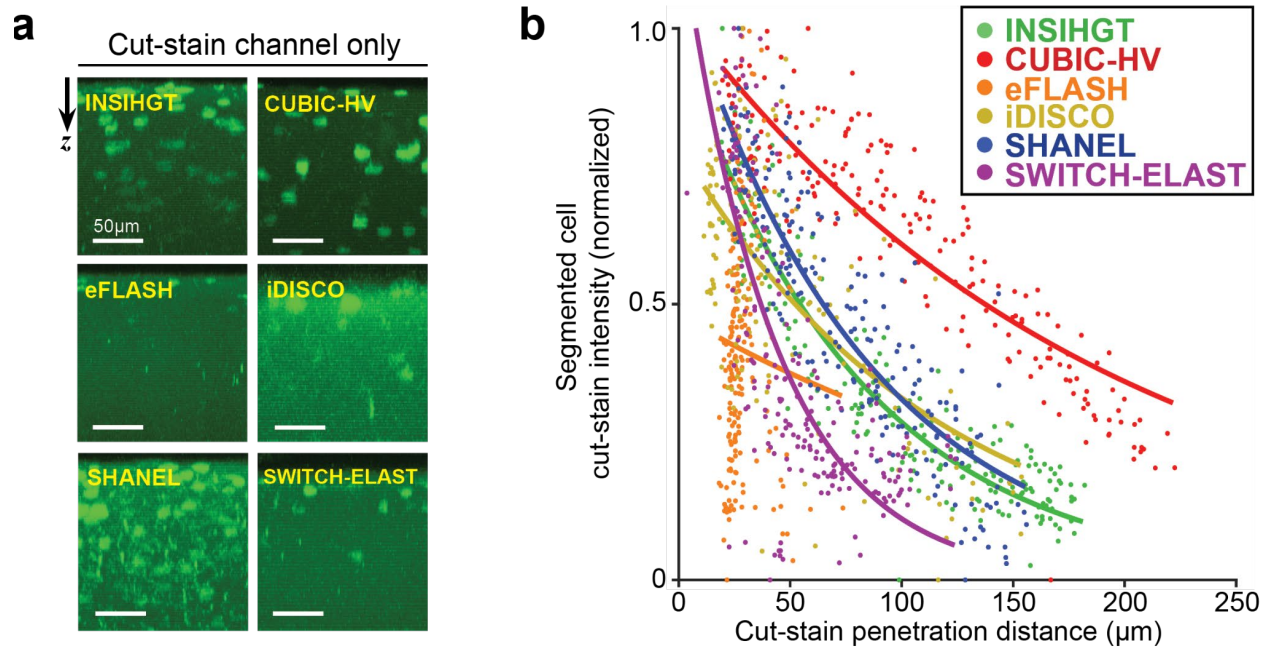

**Supplementary Figure 7. Analysis of staining efficacy of various methods.** **a**  $x$ - $z$  projection of larger white boxed areas from **Figure 2b** and **S6a** at deep bulk-staining penetration depths, with only the cut-staining channels (without the use of any deep immunostaining methods) shown. The deeper the penetration, the more permeabilized the tissue. **b** Quantitative comparison of tissue permeabilization by correlating cut-staining penetration depth and cut-staining intensity.



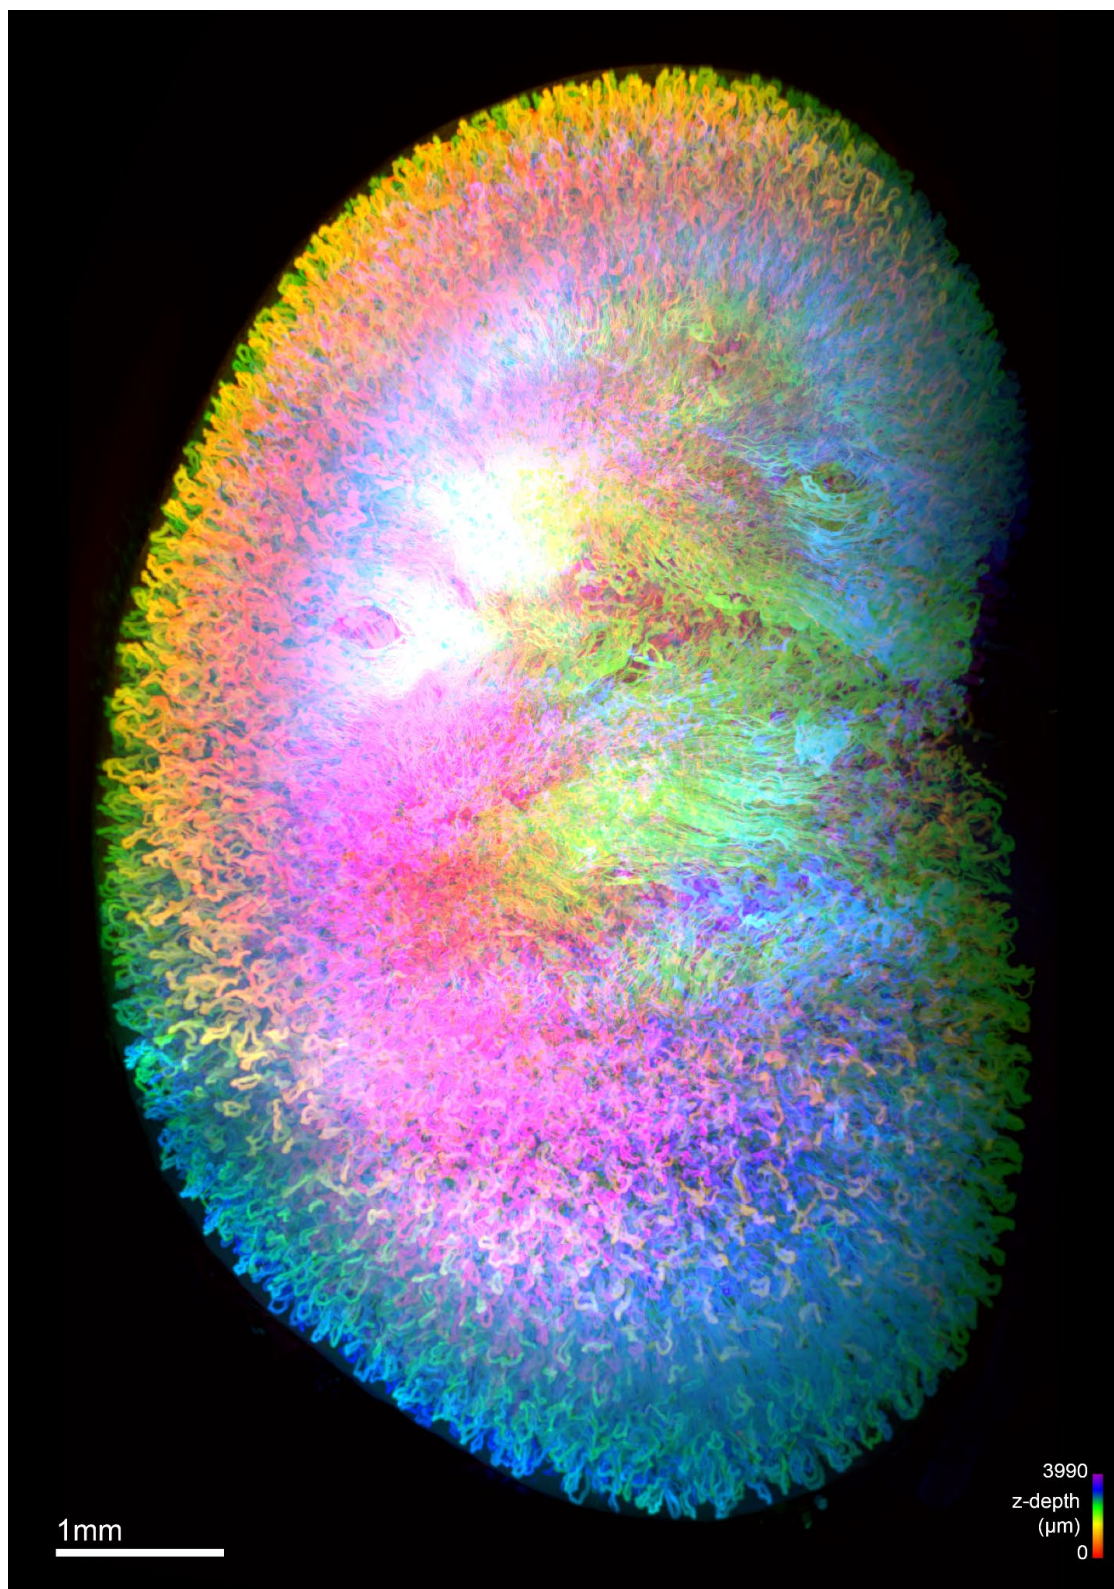

**Supplementary Figure 8. Whole mouse kidney stained with *Lycopersicon esculentum* (Tomato) Lectin. 3D rendering, colour-coding: z-depth.**



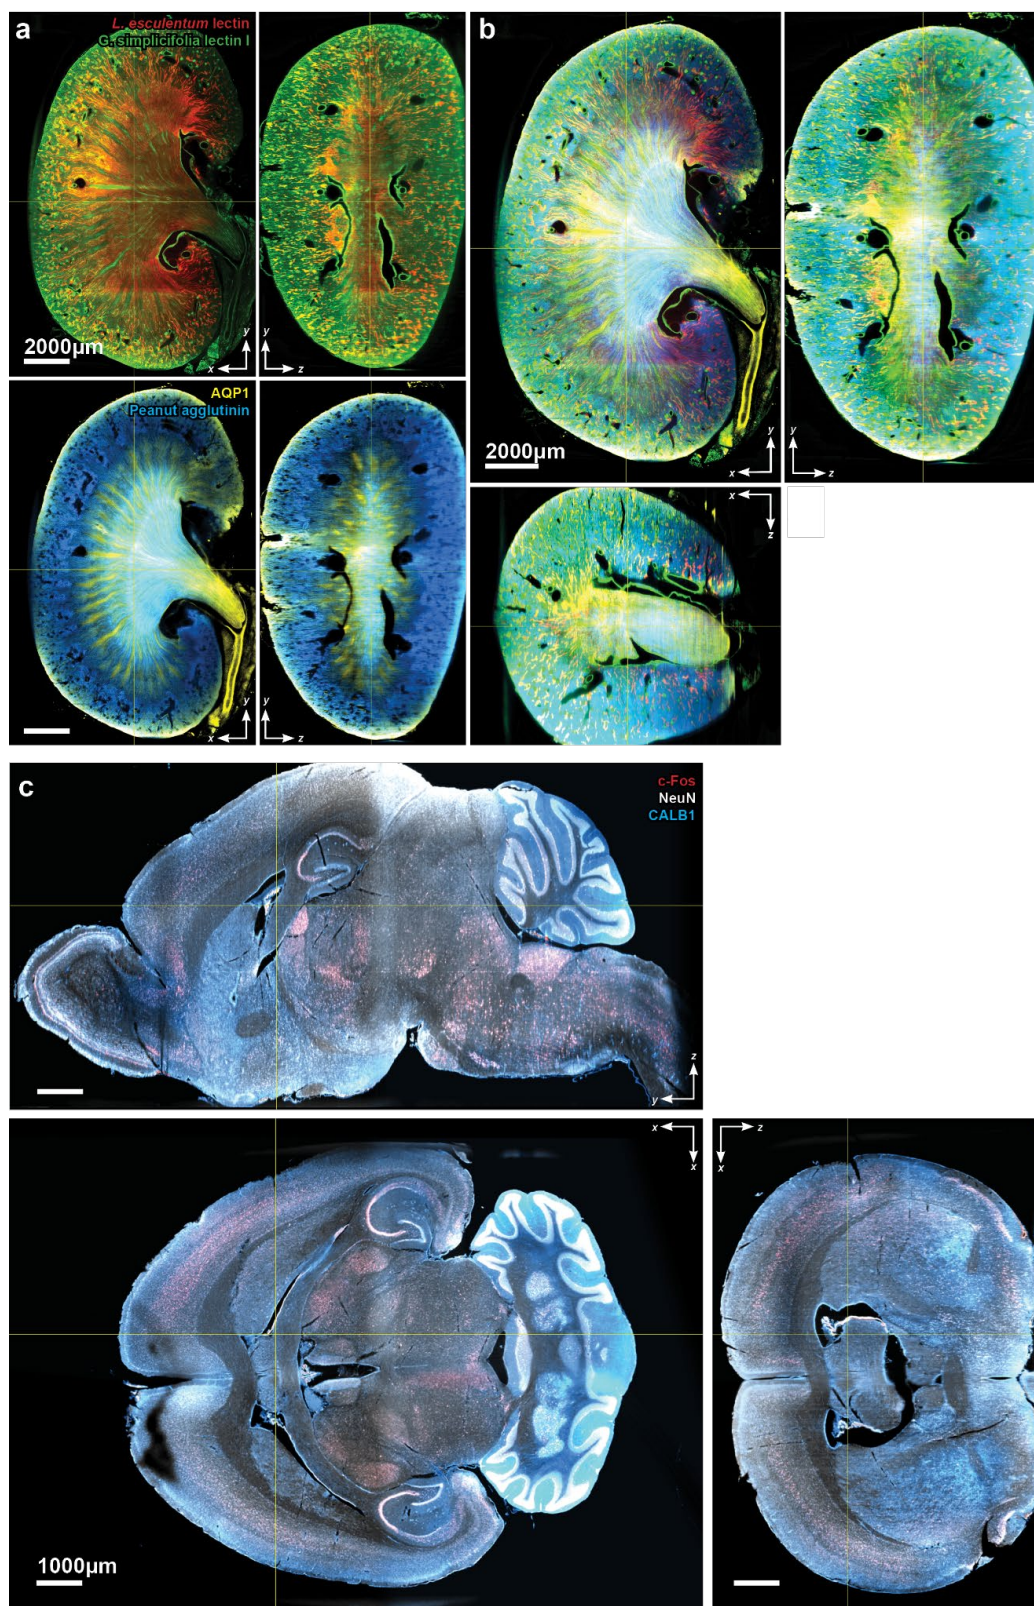

**Supplementary Figure 9. Orthogonal views of densely labelled samples in Fig 3. a-b** Orthogonal views of the 4-plex sample in Fig 3c-d. **c** Orthogonal views of the 3-plex 36-month-old (biological age) mouse brain sample in Fig 3e-i.

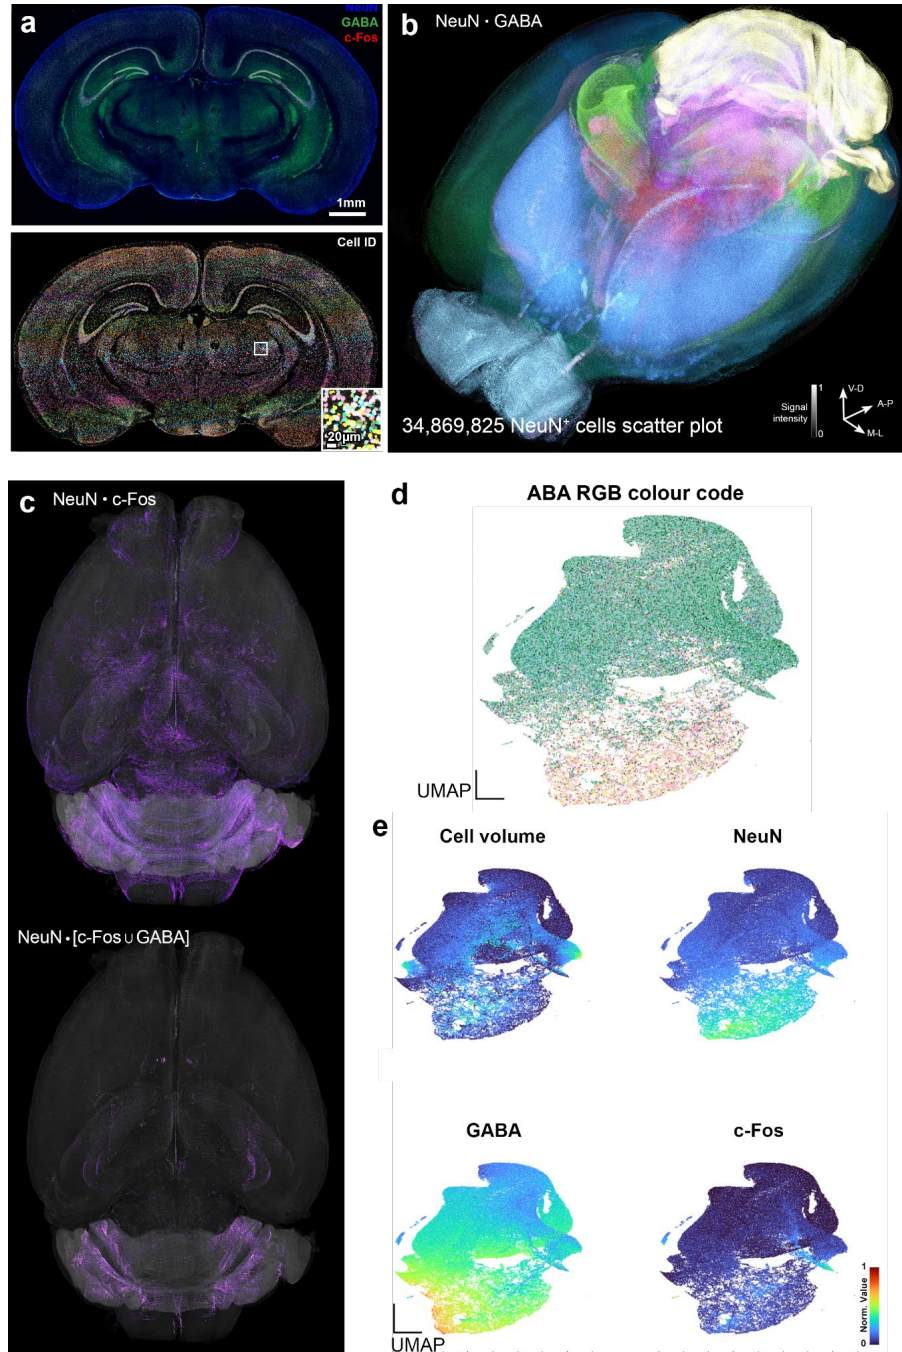

**Supplementary Figure 10. INSIHGT enables whole brain structural molecular functional quantification.** **a** Whole mouse brain multiplexed mapping of over 34 million neurons by molecular (NeuN), neurotransmitter type (GABA), and functional (c-Fos) mapping. An example coronal slice and its corresponding 3D segmentation results are shown in the upper and lower panels, respectively. Inset in the lower panel shows the cell masks in the white boxed area. **b** Rendered view of all segmented cells, color-coded according to brain regions with intensity modulated by a combination of marker levels. The RGB color codes for the brain regions are based on that of the Allen Brain Atlas CCFv3. **c** Whole-brain active neurons and GABAergic neurons inferred by double positivity in c-Fos and NeuN (upper panel) and triple positivity in c-Fos, NeuN and GABA (lower panel). **d** UMAP embedding of 0.35M (1%) segmented NeuN+ cells in **b** with spatial regional classification. UMAP embedding was based on cell volume, NeuN and c-Fos expression levels and GABA levels detected with INSIHGT. These normalized values were color-coded in **e**.



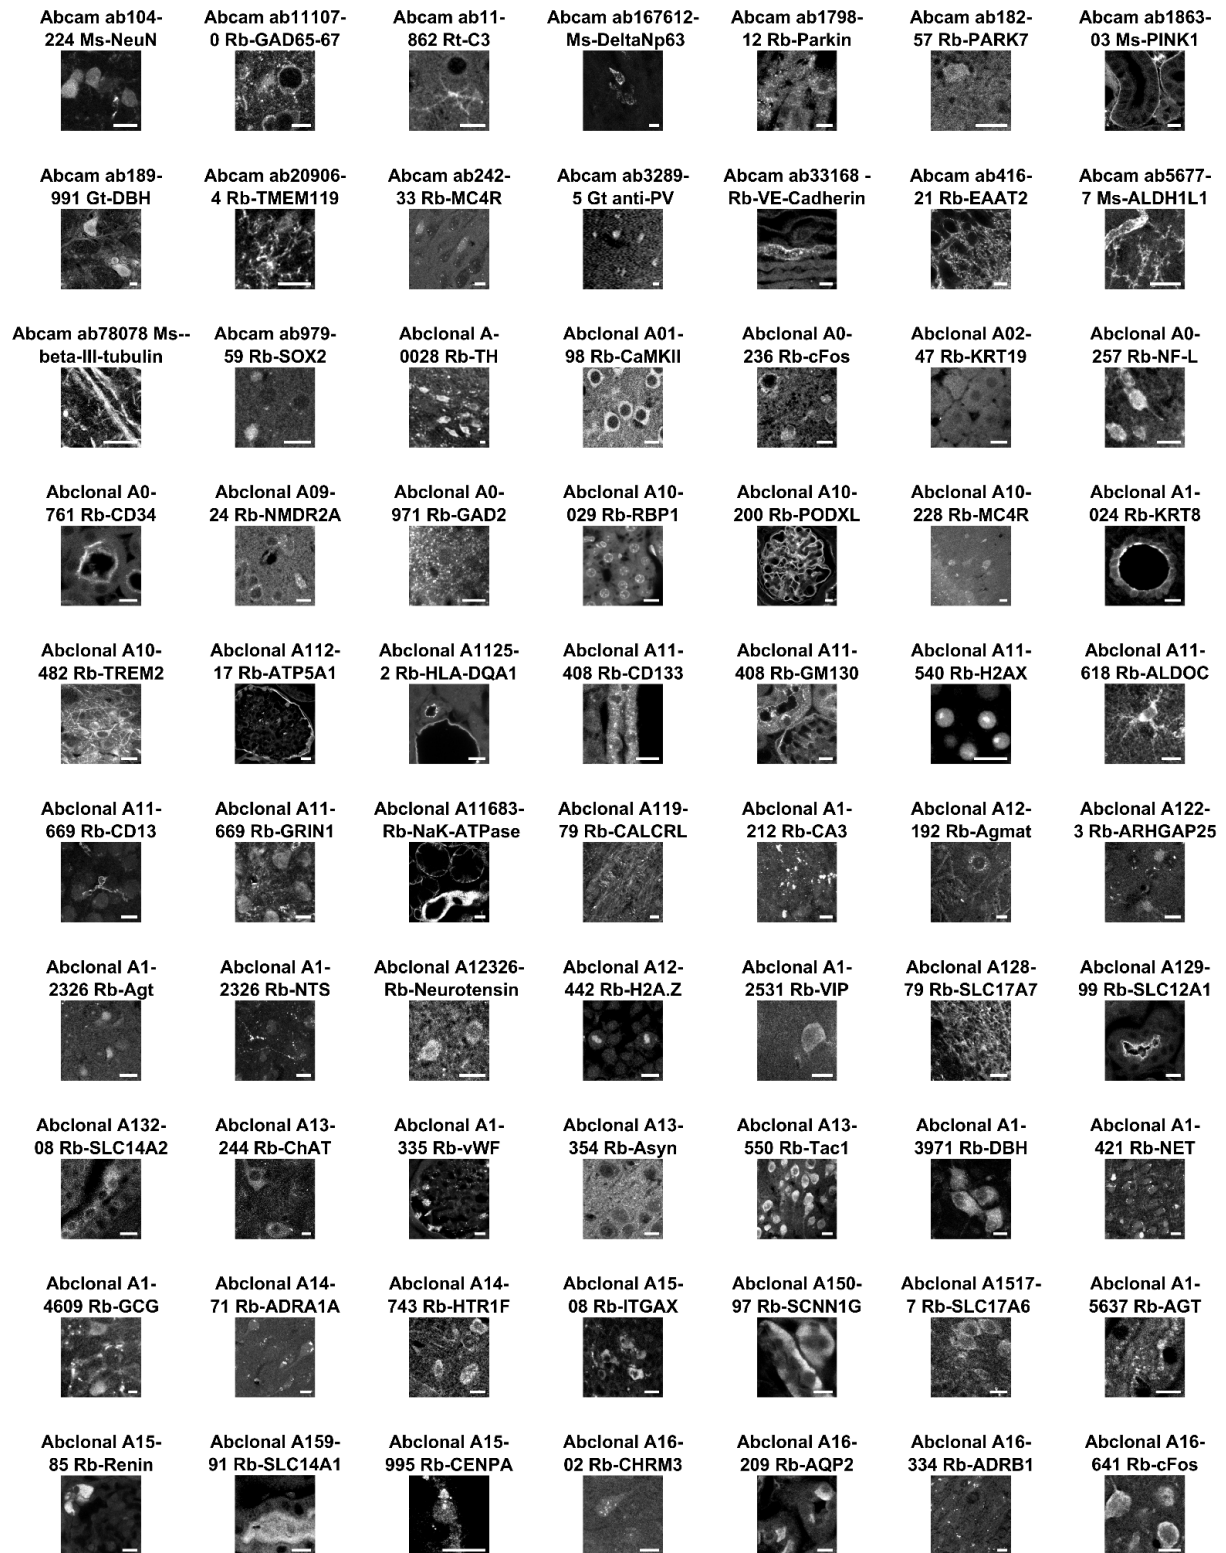

Supplementary Figure 11. Representative images from INSIHGT-compatible antibodies, Part 1. Scale bars are set to 10  $\mu$ m.

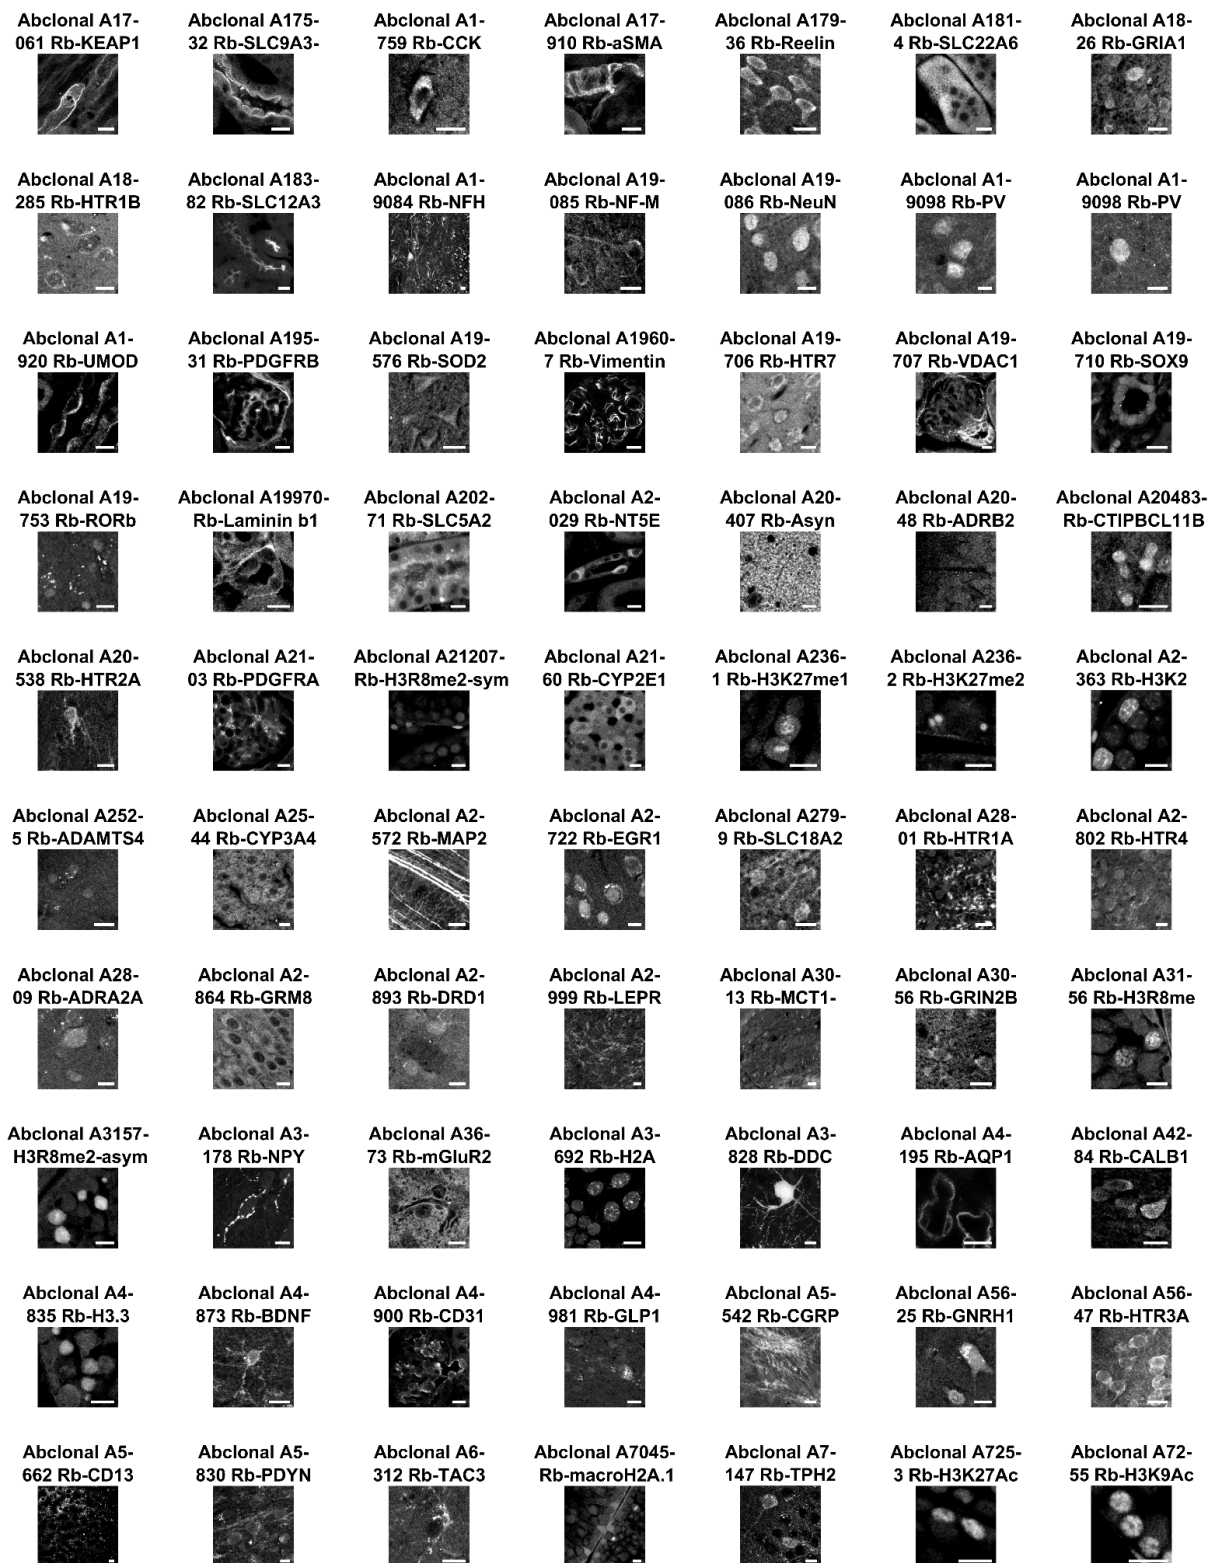

Supplementary Figure 12. Representative images from INSIHGT-compatible antibodies, Part 2. Scale bars are set to 10  $\mu\text{m}$ .

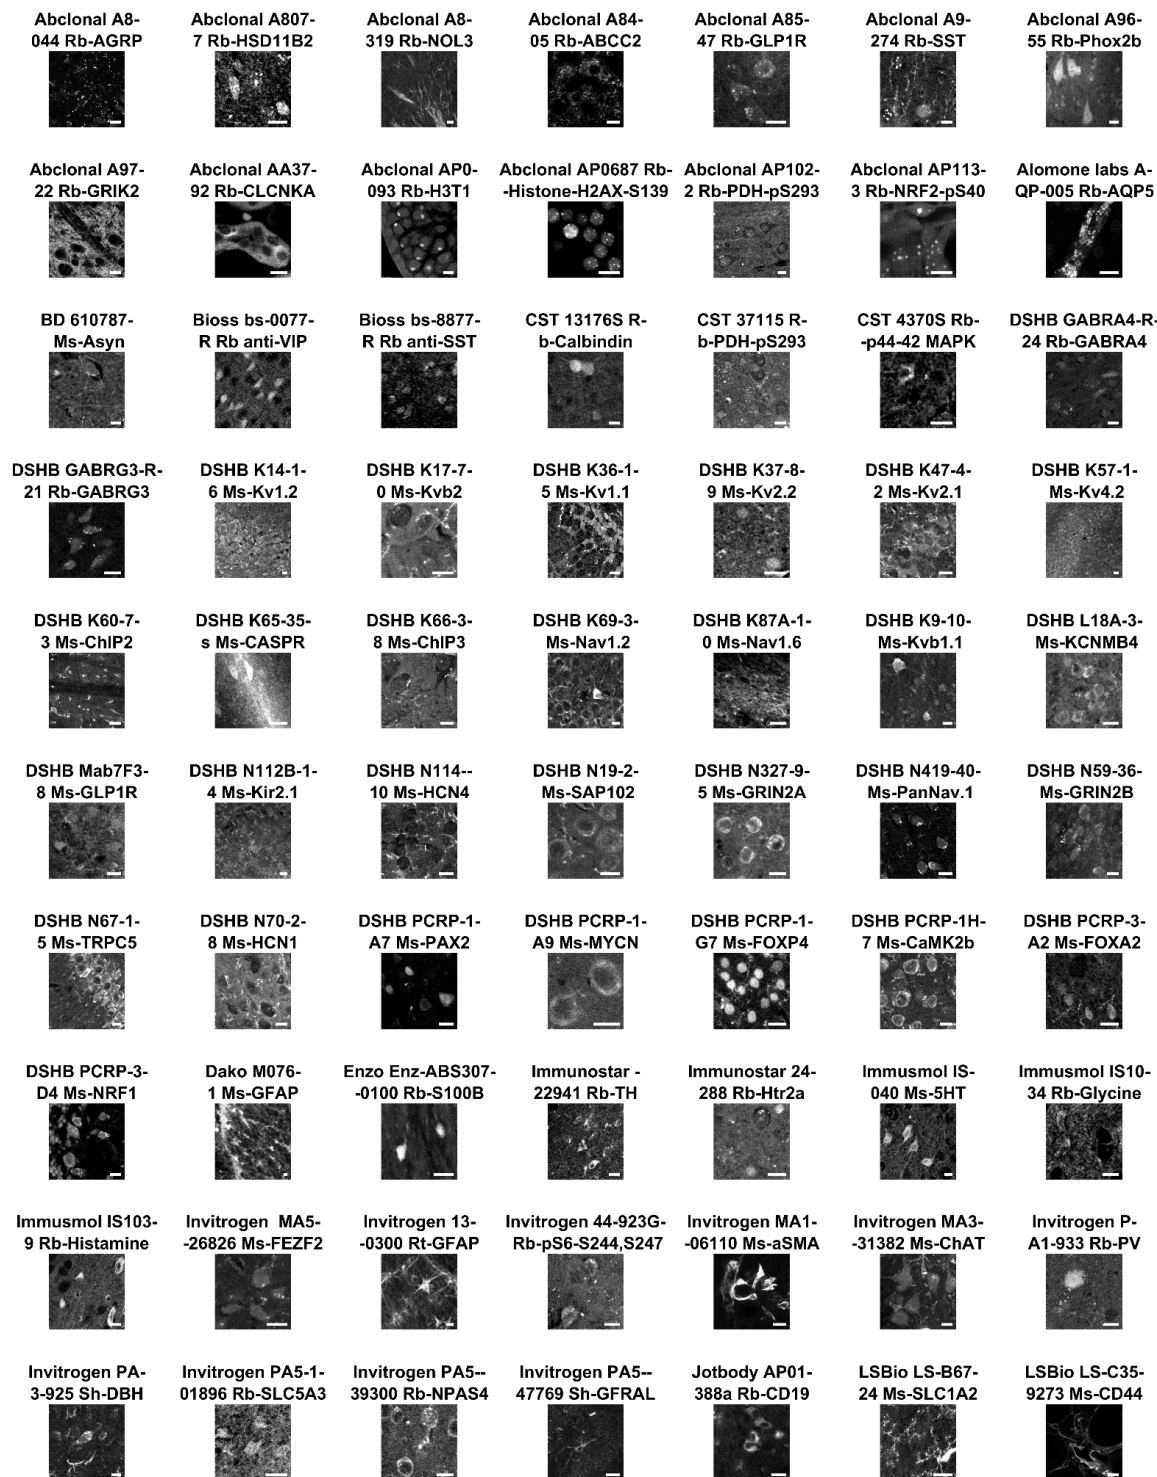

Supplementary Figure 13. Representative images from INSIHGT-compatible antibodies, Part 3. Scale bars are set to 10  $\mu$ m.



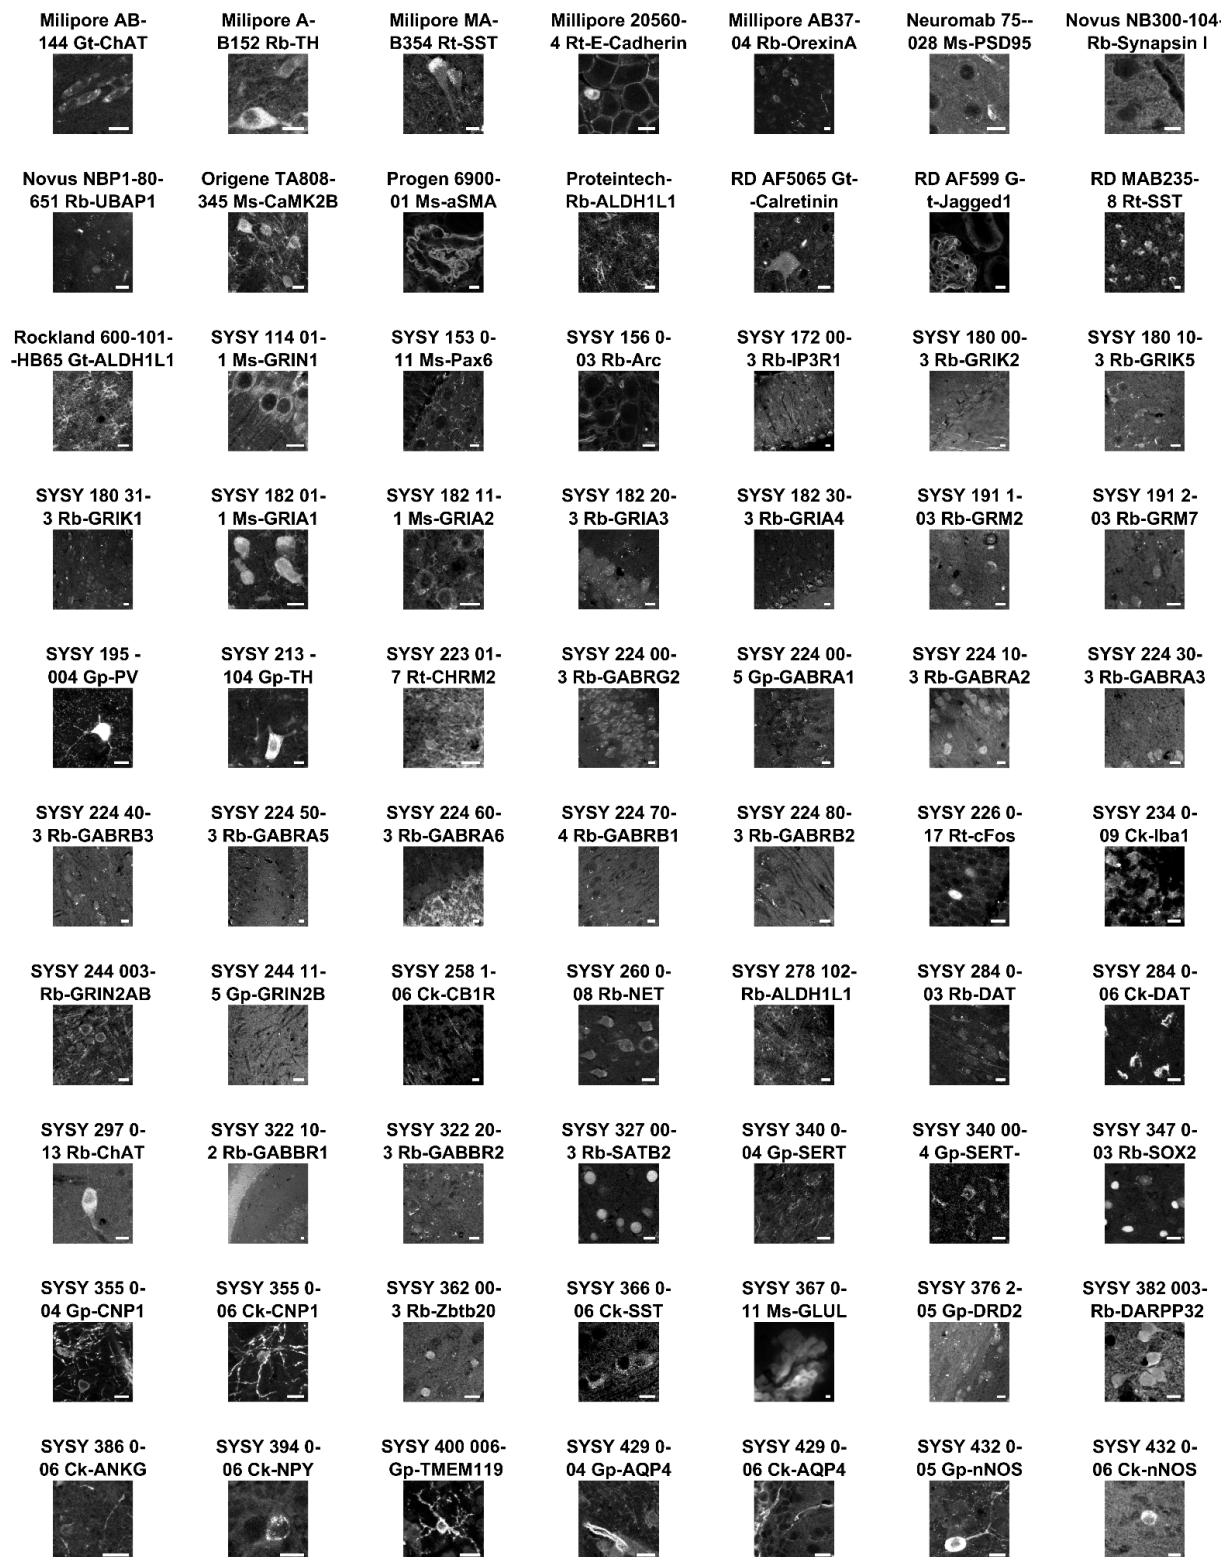

Supplementary Figure 14. Representative images from INSIHGT-compatible antibodies, Part 4. Scale bars are set to 10  $\mu$ m.

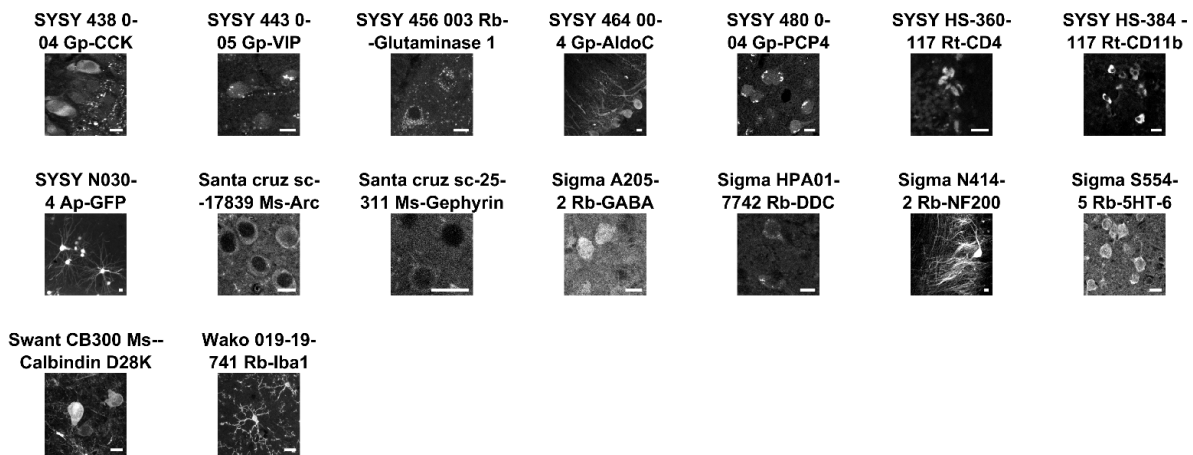

**Supplementary Figure 15. Representative images from INSIHGT-compatible antibodies, Part 5. Scale bars are set to 10  $\mu$ m.**

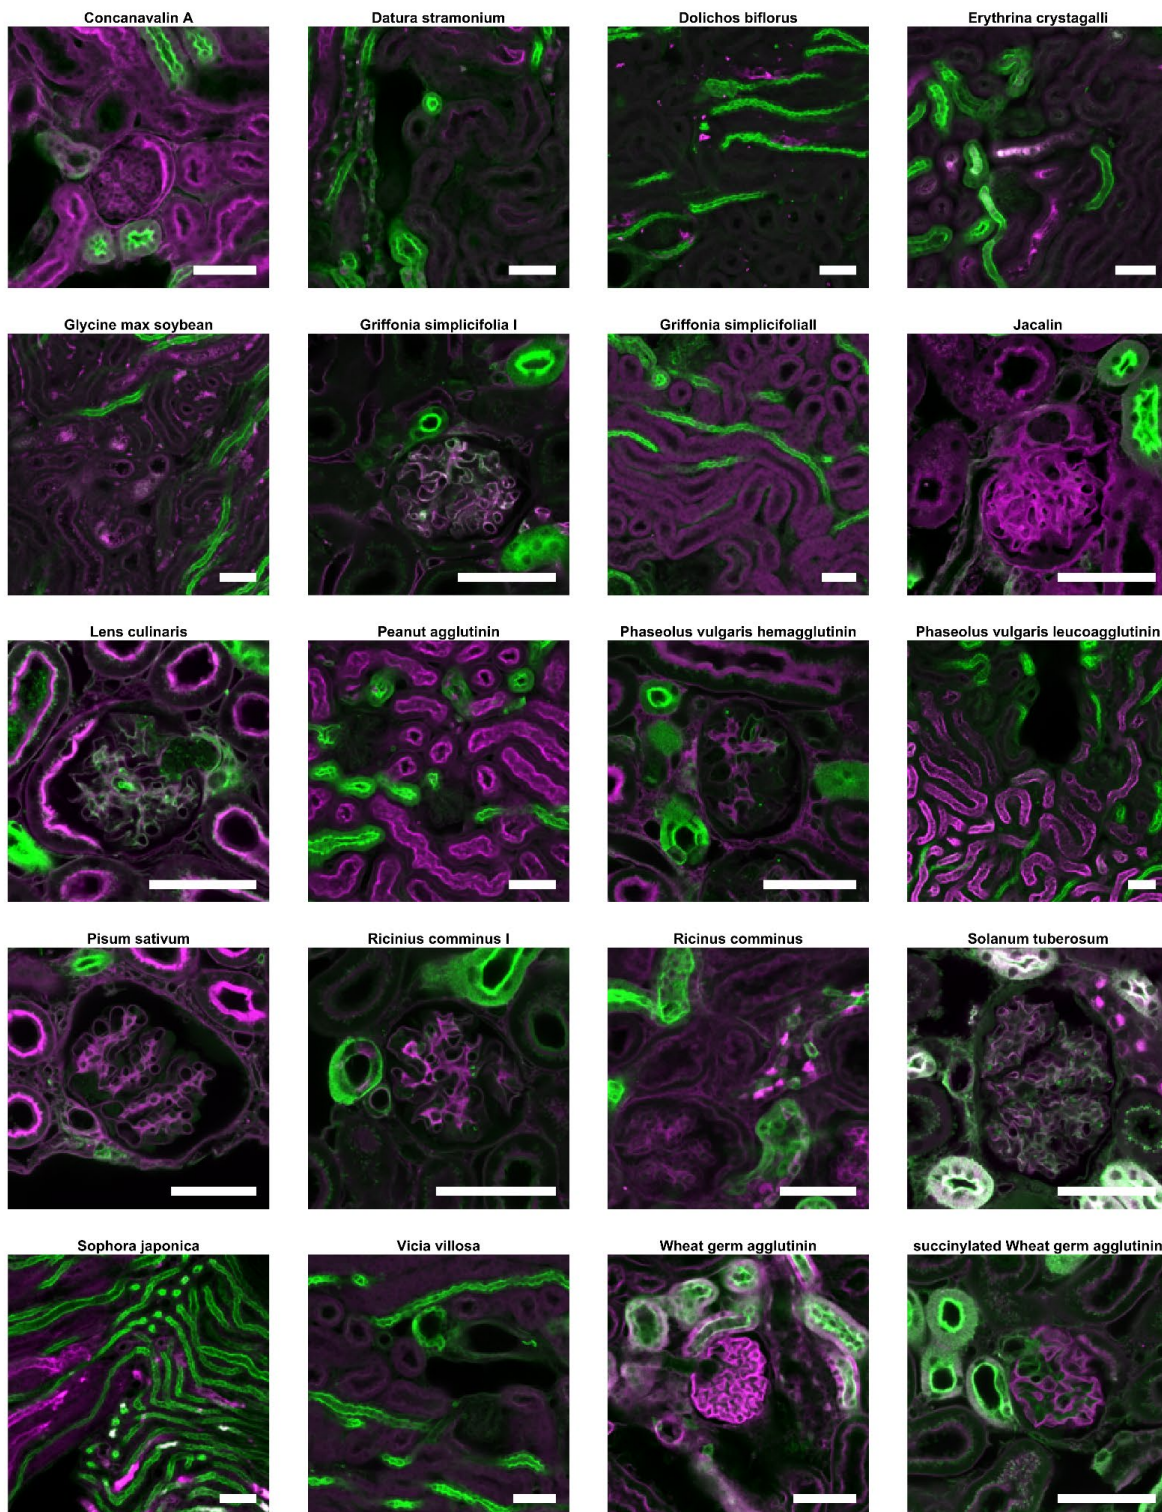

**Supplementary Figure 16. Representative images of lectins histochemistry compatible with INSIHGT performed on mouse kidney tissue.** Shown in magenta are the titled lectin's signals. The signals from *Lycopersicon esculentum* lectin are shown in green for orientation. Scale bars are set to 50  $\mu$ m.

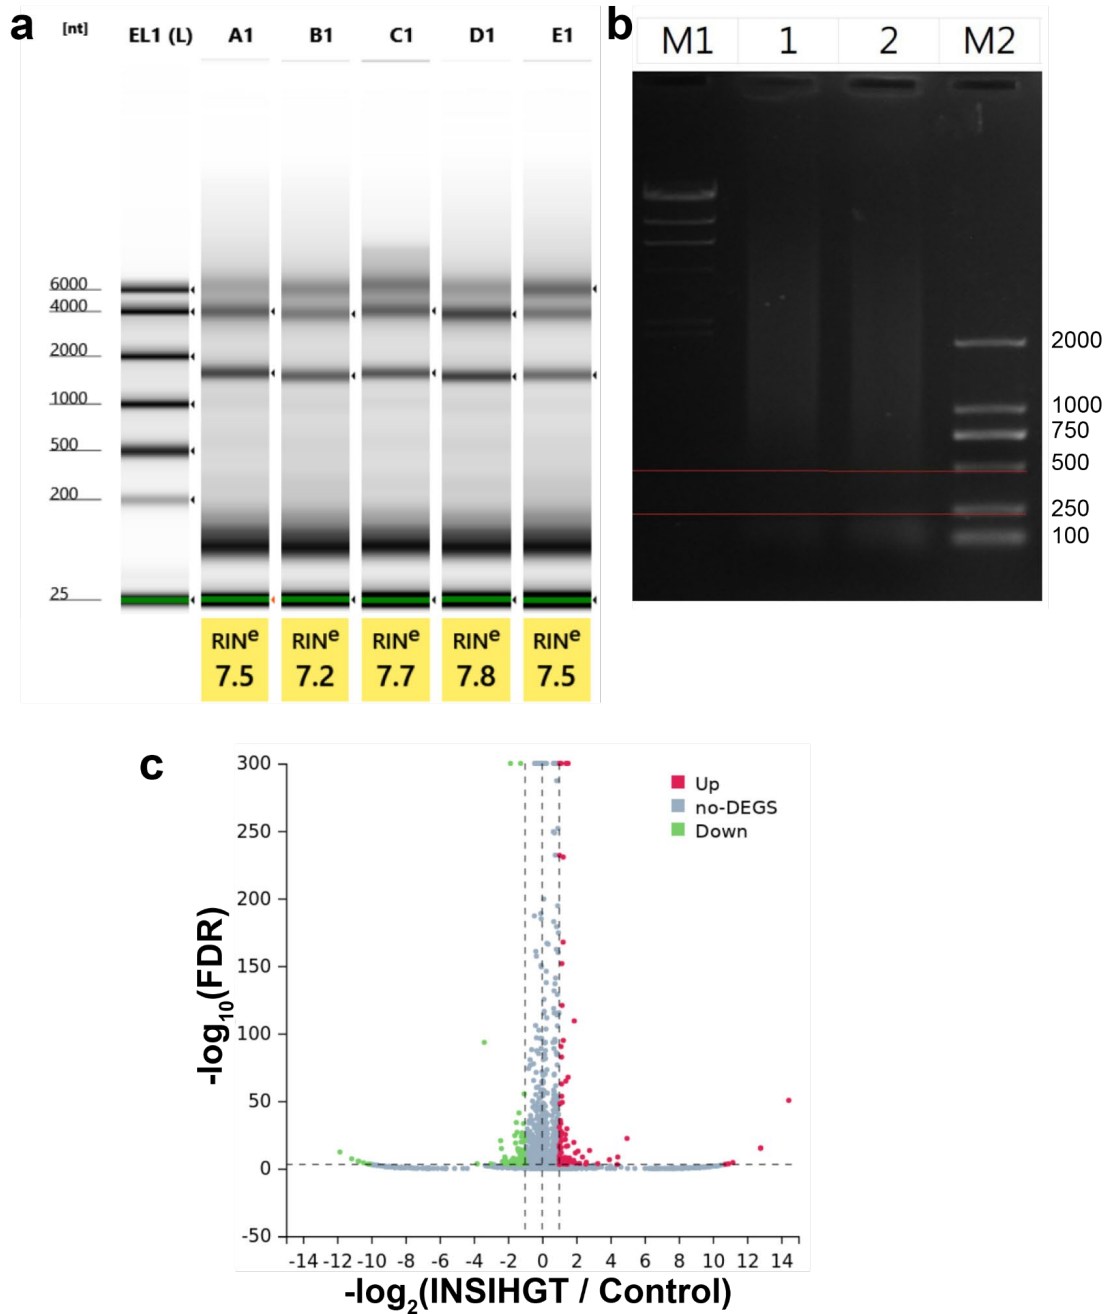

**Supplementary Figure 17. RNA integrity analysis and whole genome DNA extraction electrophoretogram reveals non-destructiveness of INSIHGT.** **a** RNA integrity number (RIN) analysis of INSIHGT-retrieved tissues. The wells contain samples that are (A1) control, (B1) with delipidation, (C1) with INSIHGT solution A treatment, (D1) with INSIHGT solution B treatment, (E1) with BABB clearing. **b** Whole genome DNA extraction electrophoretogram. (M1)  $\lambda$ -Hind III digest DNA (Takara), (M2) D2000 (Tiangen). (1) Control, (2) INSIHGT-treated sample following our described full pipeline with 3 days of INSIHGT solution A incubation. DNA total mass for control (14.588  $\mu$ g) and INSIHGT-treated sample (10.12  $\mu$ g), and their DNA length (DNA fragment  $\geq$  500bp) are comparable. **c** Volcano plot of differentially expressed genes between control (non-INSIHGT-treated) and INSIHGT-treated samples. The INSIHGT-treated sample was performed with 3 days of incubation in INSIHGT buffer A, 1 day of incubation in INSIHGT buffer B, cleared with BABB, and retrieved with PBS washing for RNA extraction and sequencing.



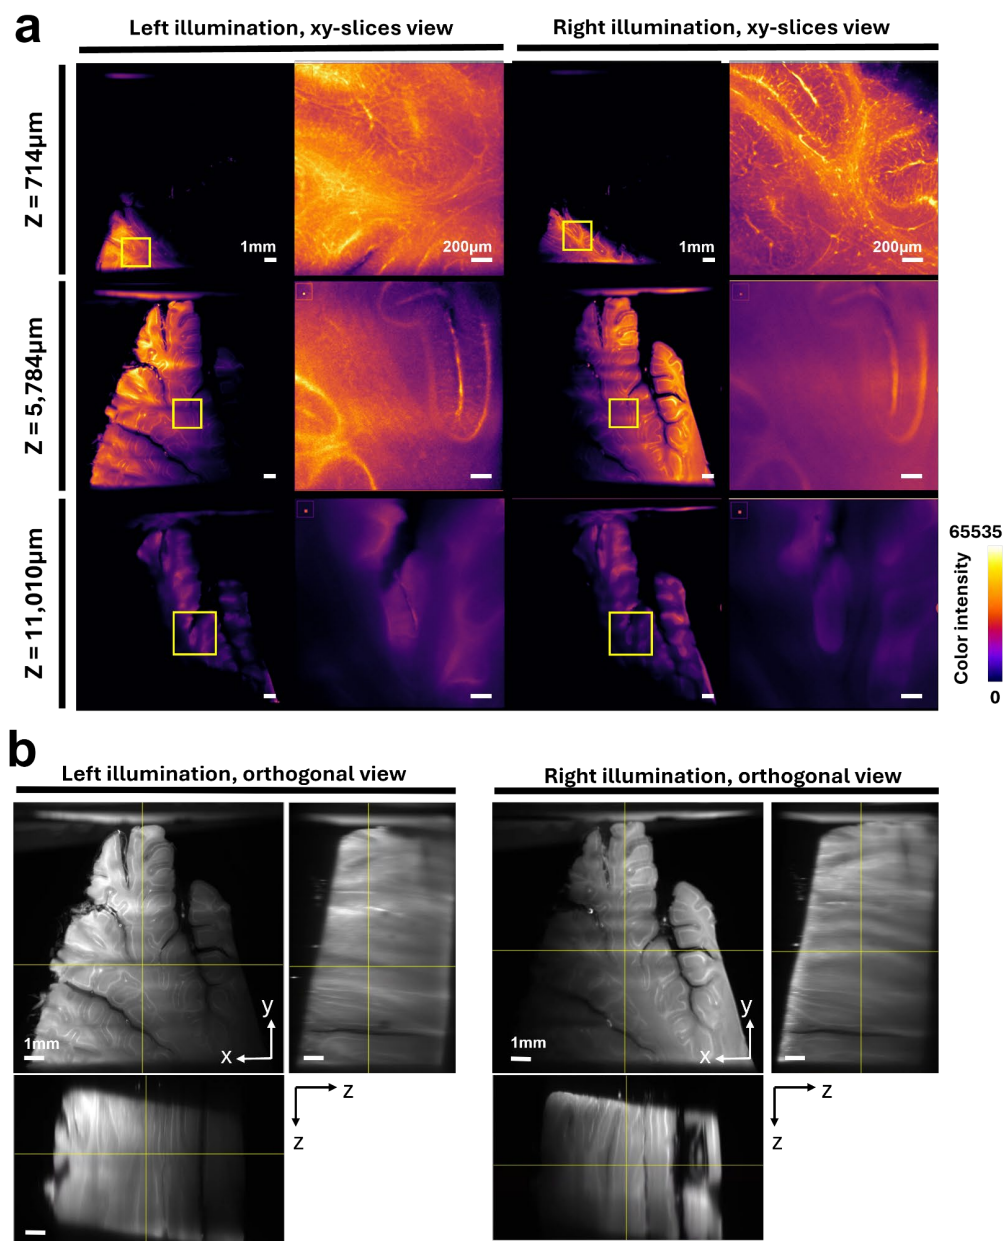

**Supplementary Figure 18. Light-sheet microscopy-based assessment of macromolecular probe penetration and its limitations.** **a** Attempted MesoSPIM imaging of the same human cerebellum sample as shown in **Fig. 5d - f**. Due to the strong light scattering and absorbance in such a large, pigmented sample, excitation light penetration is limited, as evident by the differences in left versus right laser illumination. The image quality also deteriorates along the z-direction as the emission light must travel through the thick sample to reach the camera. Light-sheet microscopy is hence suboptimal in the evaluation of probe penetration for large human tissues. Scale bars are 1mm in the overview and 200 $\mu\text{m}$  for the enlarged views of the yellow boxes. **b** Orthogonal views of the same sample under left and right illumination, illustrating the deterioration of image quality along the z-direction. Scale bars, 1mm.

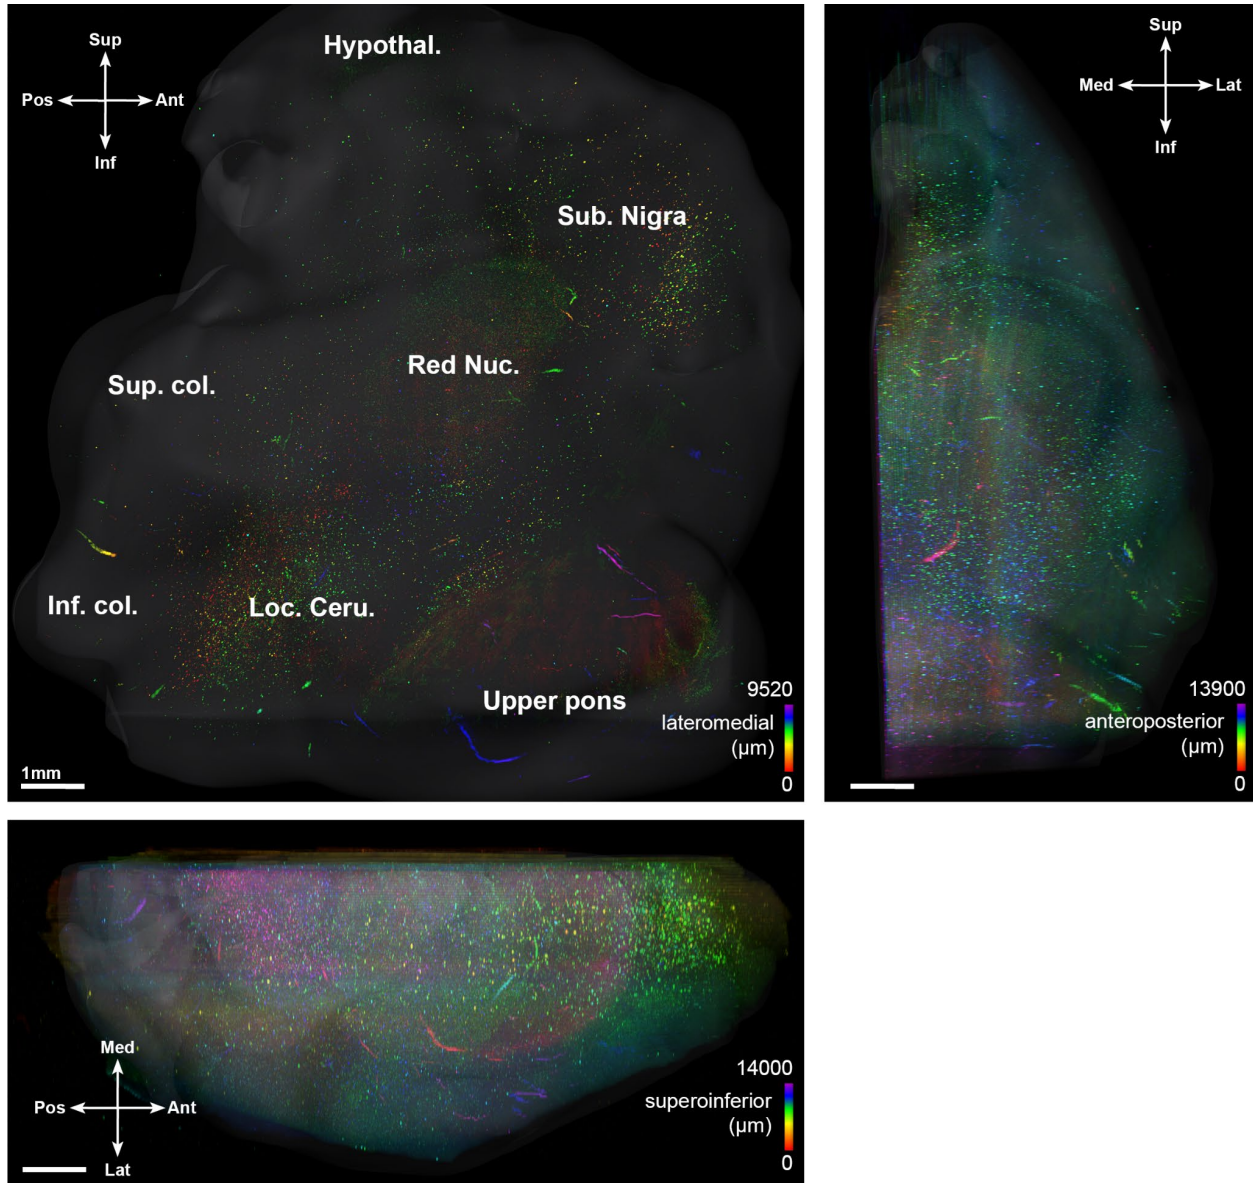

**Supplementary Figure 19. Overview of the human brainstem stained for alpha-synuclein phosphorylated at serine 129 shown in Fig. 5g-i.** The INSIHGT immunostaining signal was color-coded according to the dimension going in and out of the paper plane. The surface rendering provides a rough view of the tissue contour. Hypothal.: hypothalamus, Loc. Ceru.: locus ceruleus, Inf. col.: inferior colliculus, Sub. Nigra: substantia nigra, Sup. col., superior colliculus.



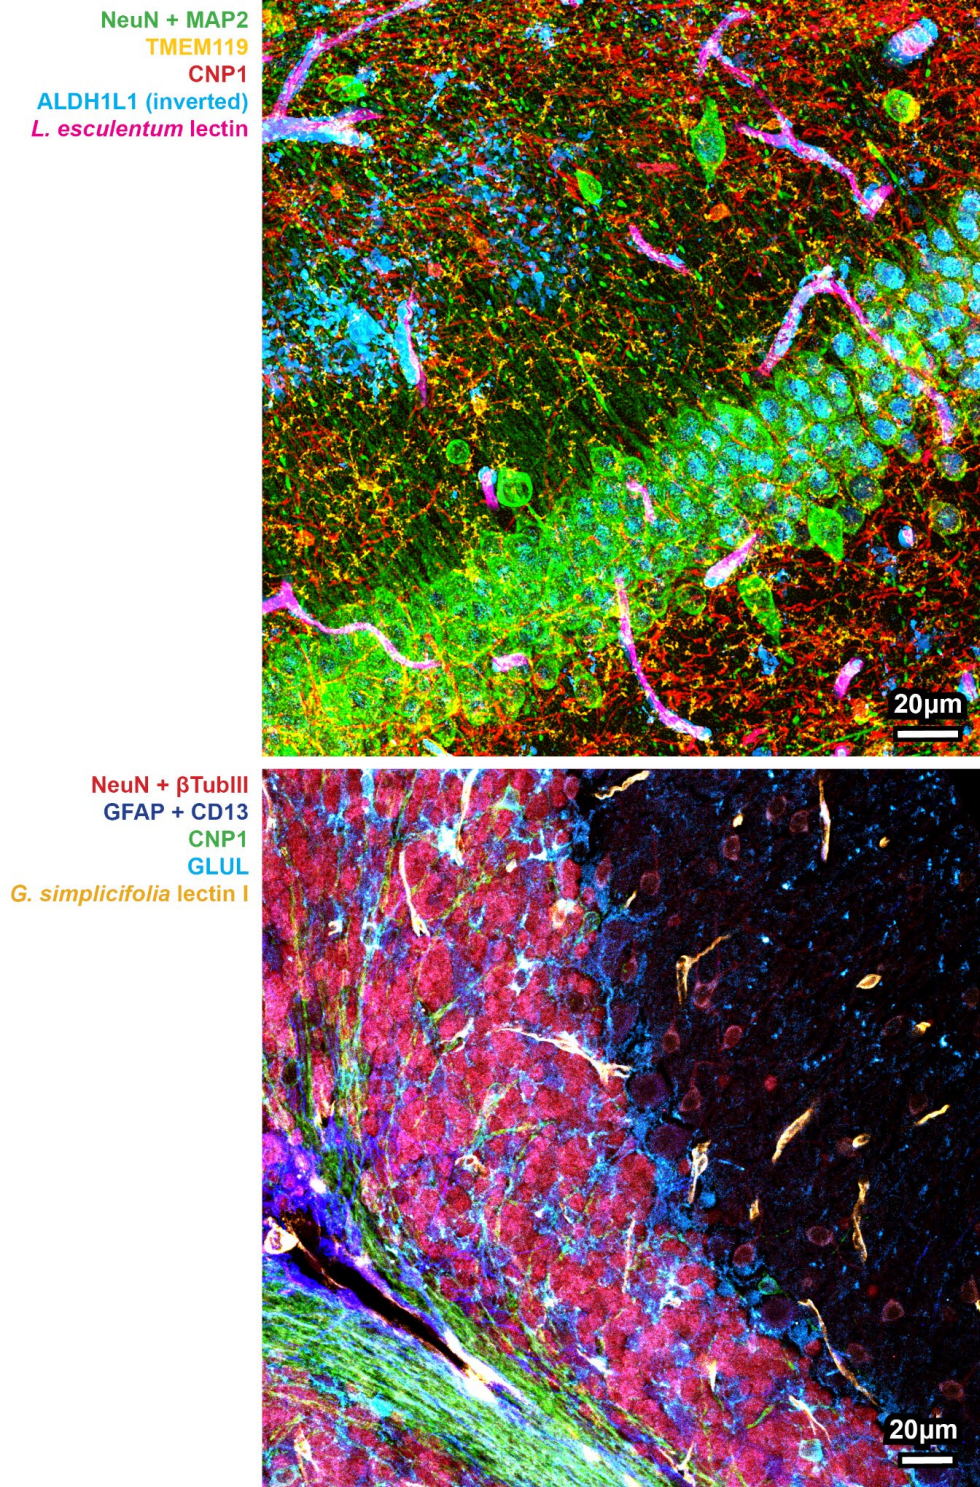

**Supplementary Figure 20. Multiplexing with INSIHGT with high concentrations of antibodies.** Upper image: mouse hippocampus stained with 6 protein probes, lower image: mouse cerebellum stained with 7 protein probes. The signal of ALDH1L1 was inverted due to the ubiquitous homogeneous staining of the original signal.

**a**

INSIHGT  
 1°Ab: Rabbit anti-PVALB  
 2°Ab: AF647-Fab anti-Rabbit

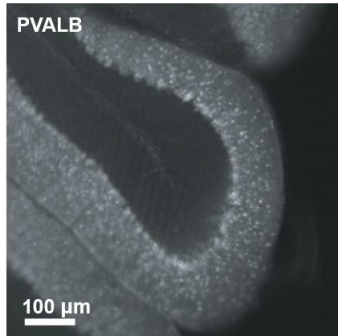

Post-stripping with  
 0.1M Na<sub>2</sub>SO<sub>3</sub> in INSIHGT solution A

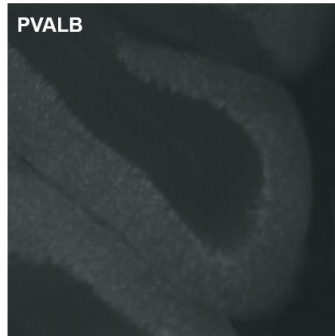

INSIHGT  
 1°Ab: Rabbit anti-NEFH  
 2°Ab: AF488-Fab anti-Rabbit

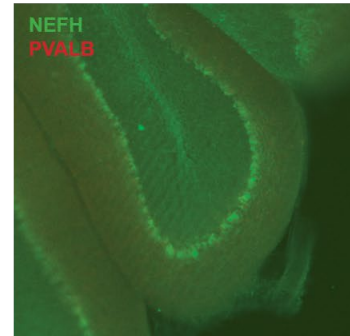

INSIHGT  
 1°Ab: Rabbit anti-PVALB  
 2°Ab: AF647-Fab anti-Rabbit

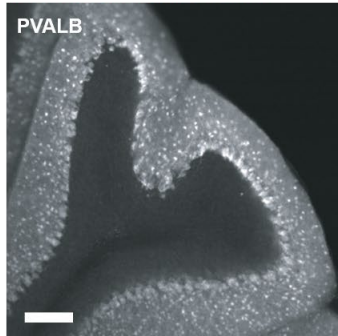

Post-stripping with  
 PBS only

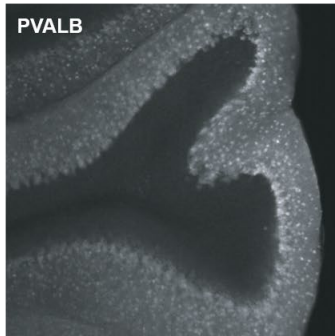

INSIHGT  
 1°Ab: Rabbit anti-NEFH  
 2°Ab: AF488-Fab anti-Rabbit

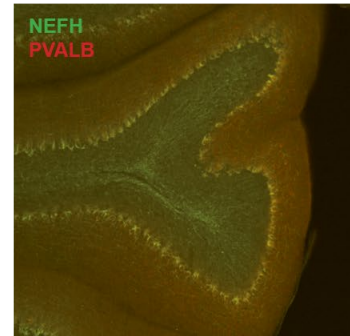**b**

**INSIHGT staining after 3 weeks of 7-round stripping (1 day at 25°C each)**

Control

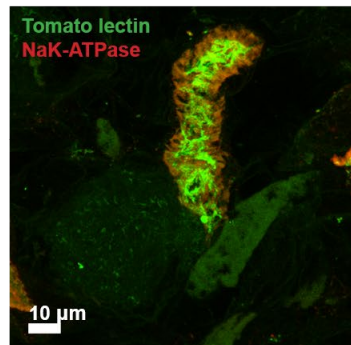

0.1M SDS in PBS

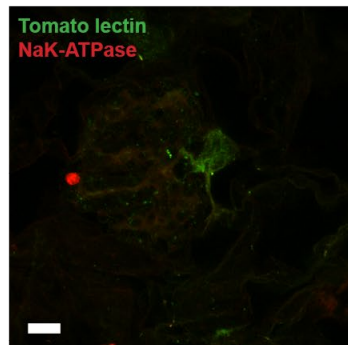

0.1M Na<sub>2</sub>SO<sub>3</sub> in INSIHGT solution A

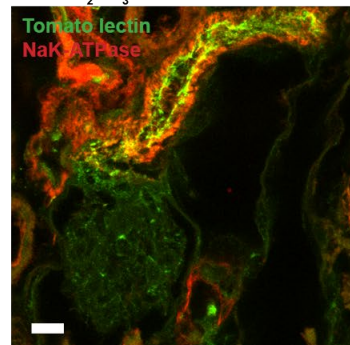

**Supplementary Figure 21. Antibody stripping and re-probing.** **a** [B<sub>12</sub>H<sub>12</sub>]<sup>2-</sup> in 1x PBSN in the presence of 0.1M Na<sub>2</sub>SO<sub>3</sub> effectively strips away the rabbit antibody staining from INSIHGT-stained slices (upper row), while PBS alone would not lead to stripping of antibodies (lower row). After stripping, a second round of INSIHGT-based rabbit anti-NEFH staining was applied to demonstrate the striped rabbit IgGs within the tissue. **b** 4% PFA-fixed mouse kidney undergone 7 weeks of stripping with SDS versus Na<sub>2</sub>SO<sub>3</sub>. The total incubation time was 3 weeks. The samples were then re-stained with INSIHGT protocol using tomato lectin (in green) and rabbit anti-NaK-ATPase antibodies (in red).



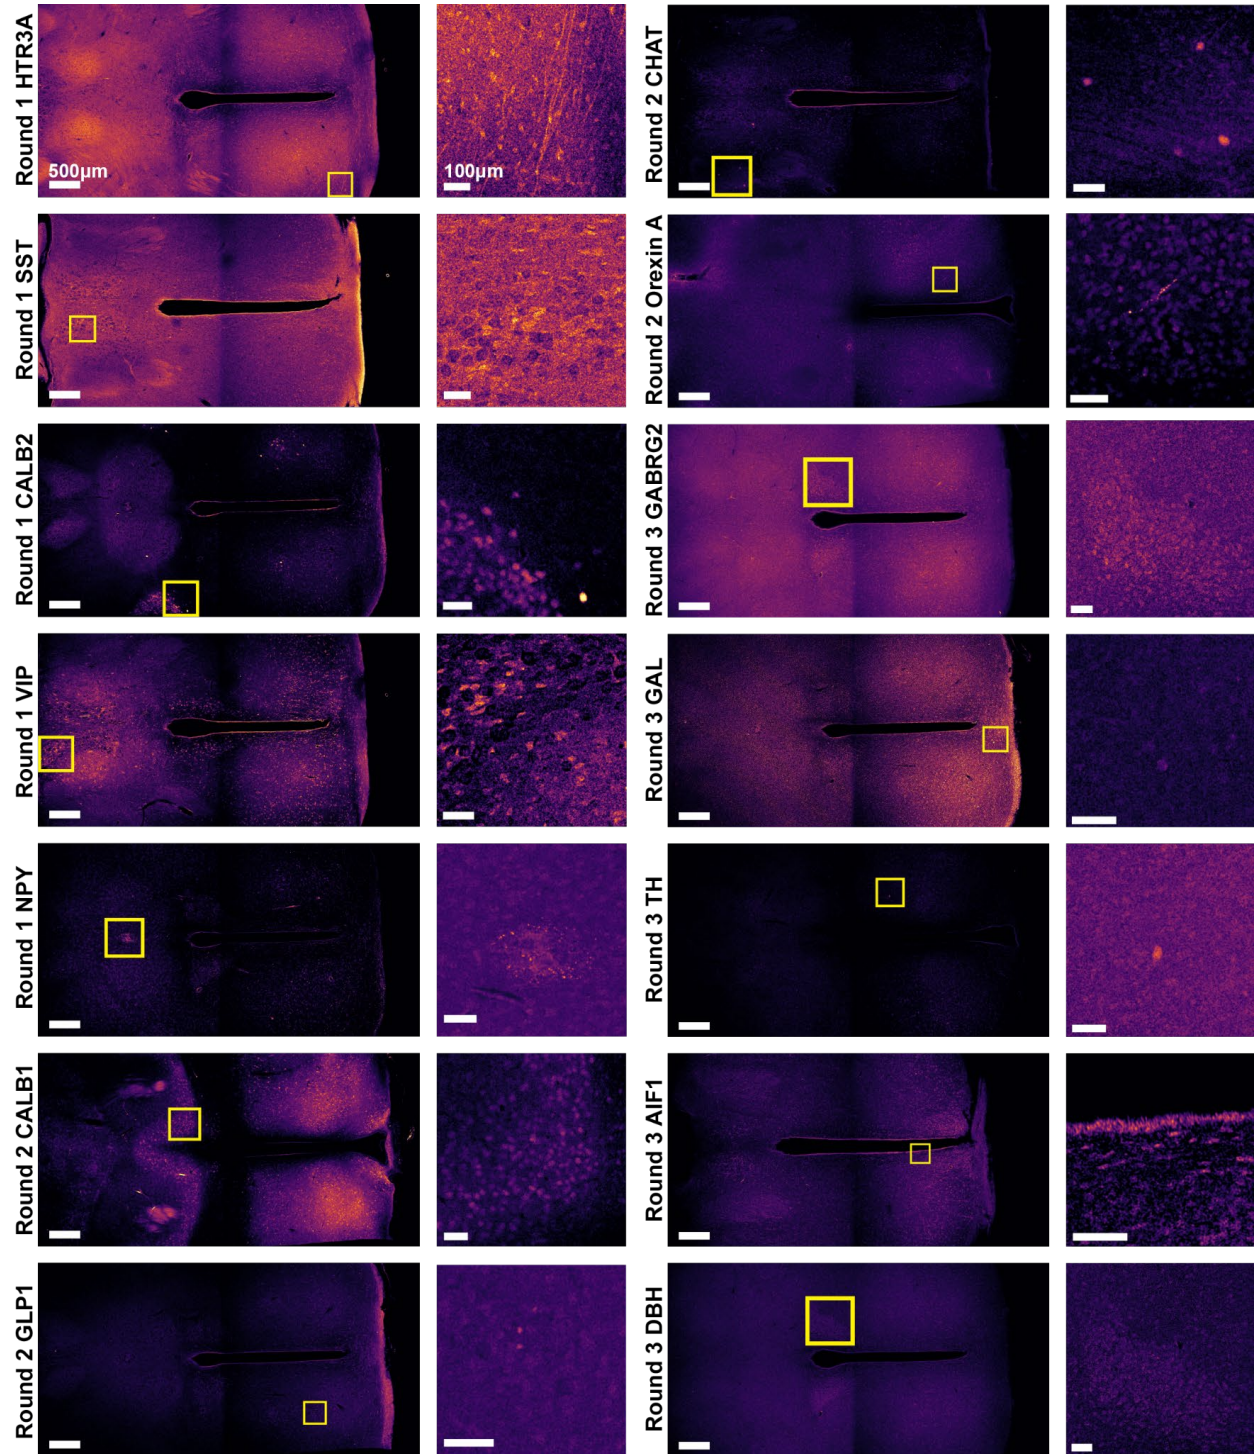

**Supplementary Figure 22. Raw aligned images of multi-round imaging of the mouse hypothalamus in Fig. 5, Part 1.** A single z-slice was excerpted from each image volume for clarity, and enlarged views from yellow-boxed regions were shown adjacent to the tile overview images. Proteins are named based on their gene names or explicitly stated otherwise (for Orexin-A and glucagon-like peptide, GLP1). Scale bars for overview images: 500µm, enlarged view images: 100µm.



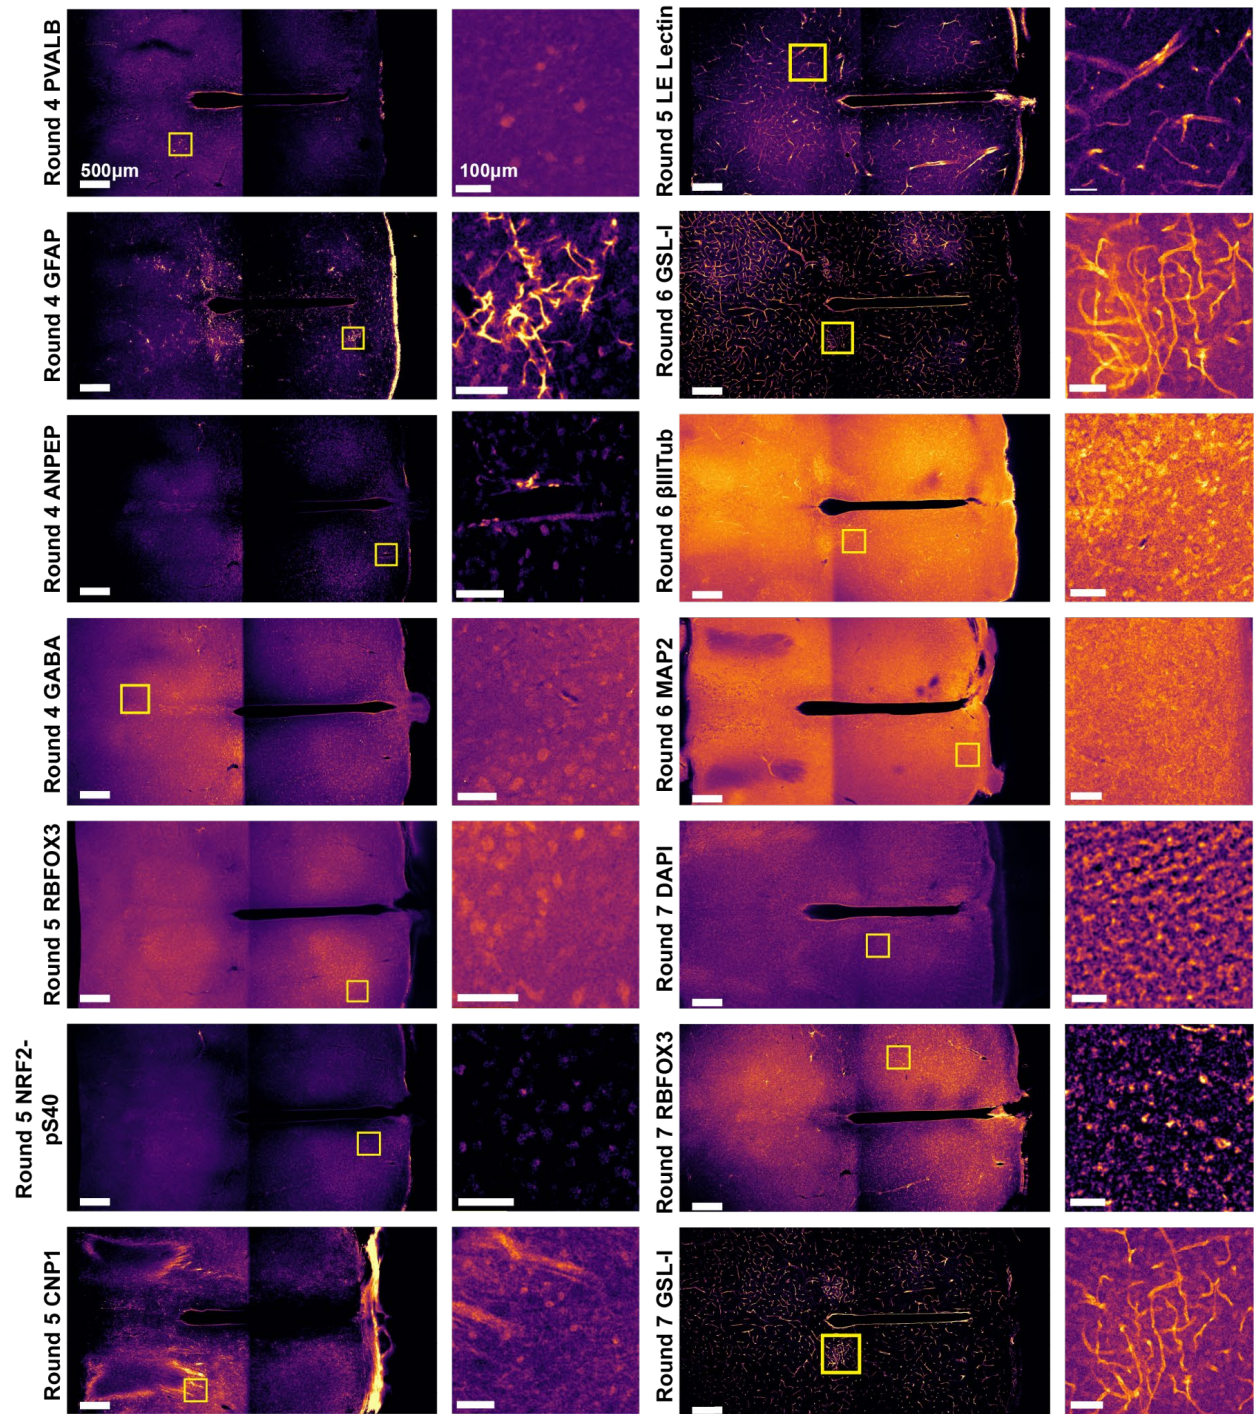

**Supplementary Figure 23. Raw aligned images of multi-round imaging of the mouse hypothalamus in Fig. 5, Part 2.** A single z-slice was excerpted from each image volume for clarity, and enlarged views from yellow-boxed regions were shown adjacent to the tile overview images. Proteins are named based on their gene names, except for GABA ( $\gamma$ -aminobutyric acid), NRF2-pS40 (NRF2 phosphorylated at serine-40 residue), LE lectin (*Lycopersicon esculentum* Lectin), GSL-I (*Griffonia Simplicifolia* Lectin I),  $\beta$ IIITub (Tubulin beta-3 chain), DAPI (4',6-diamidino-2-phenylindole). Scale bars for overview images: 500 $\mu$ m, enlarged view images: 100 $\mu$ m.



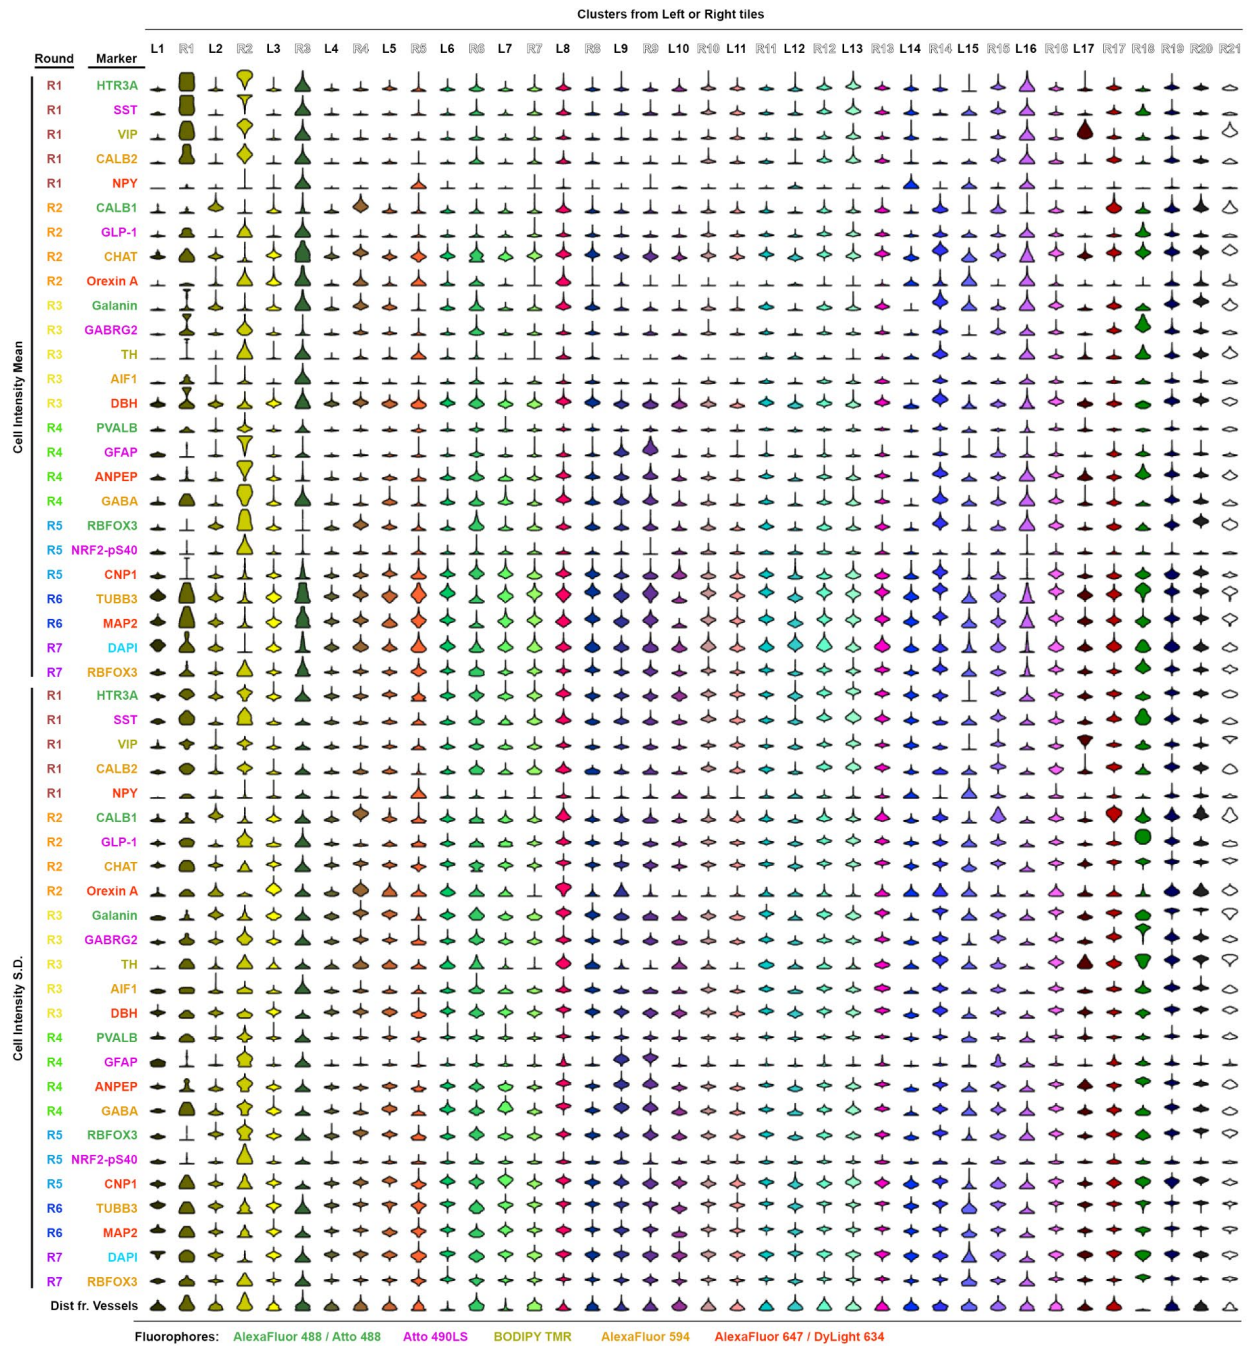

**Supplementary Figure 24. Violin Plots of Each Marker.** The plot represent immunostaining mean intensities and their standard deviations (SDs), separately, and the distance from vessels for each cluster obtained by nested UMAP analysis in **Figure 6**. The text is color-coded based on the fluorophore used in the imaging experiment.

Clusters from Left tiles

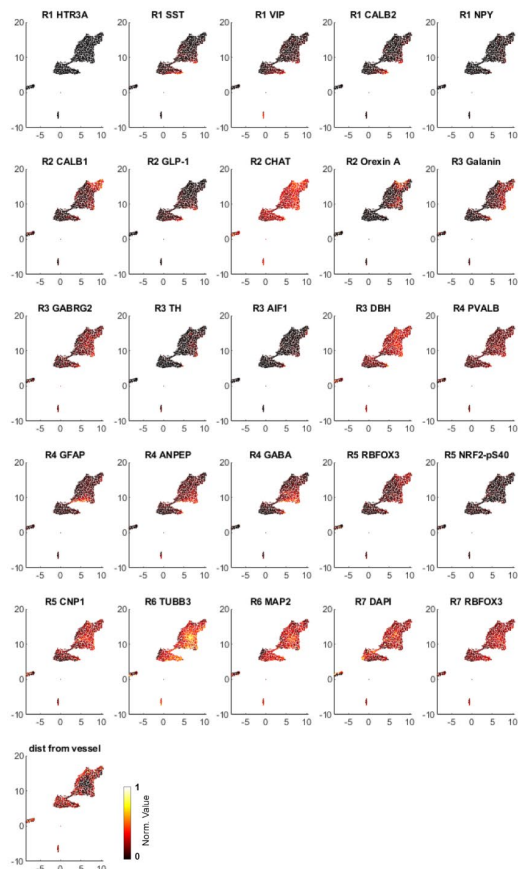

Clusters from Right tiles

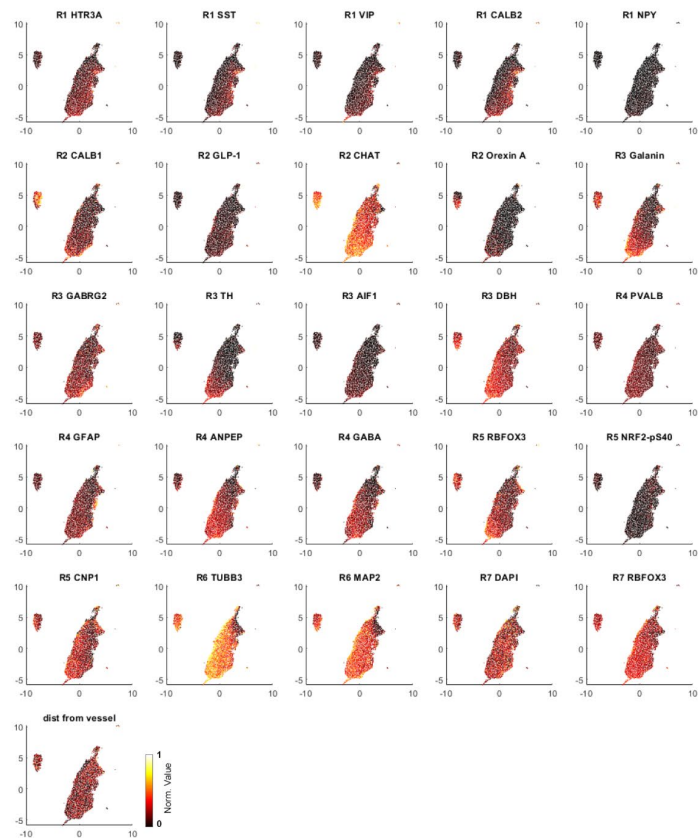

Supplementary Figure 25. The mean immunostaining intensities of each marker in a 2D-embedded UMAP space.

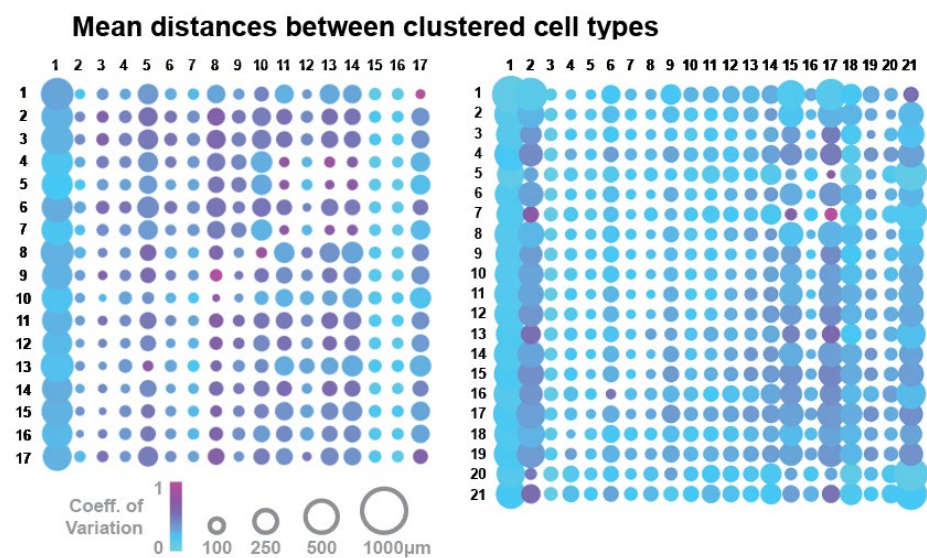

**Supplementary Figure 26. Mean nearest distance matrix between each cell type from each cluster.** The size of the dot plot represents the coefficient of variation.

### Stayers correlation statistics

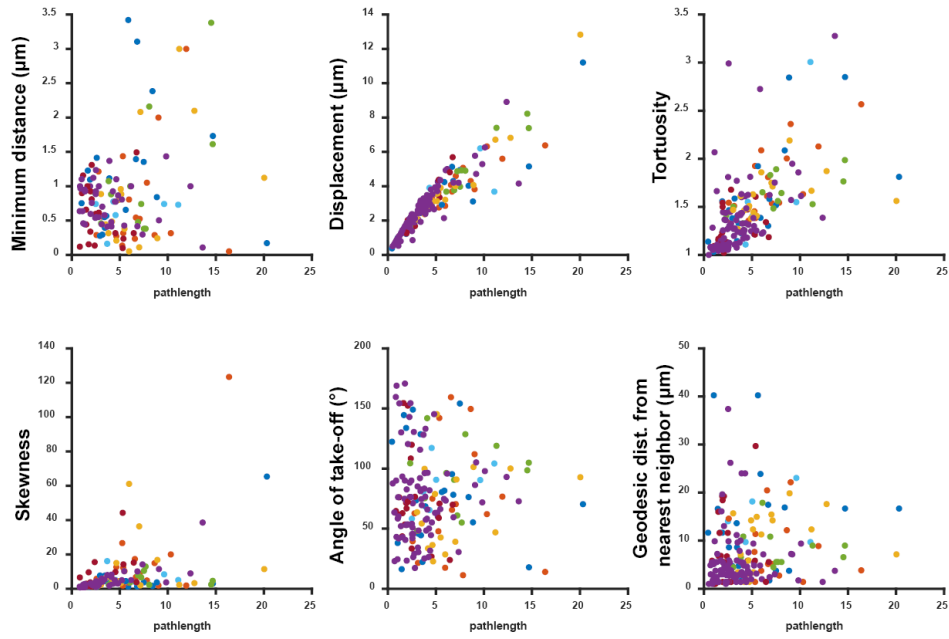

### Reachers correlation statistics

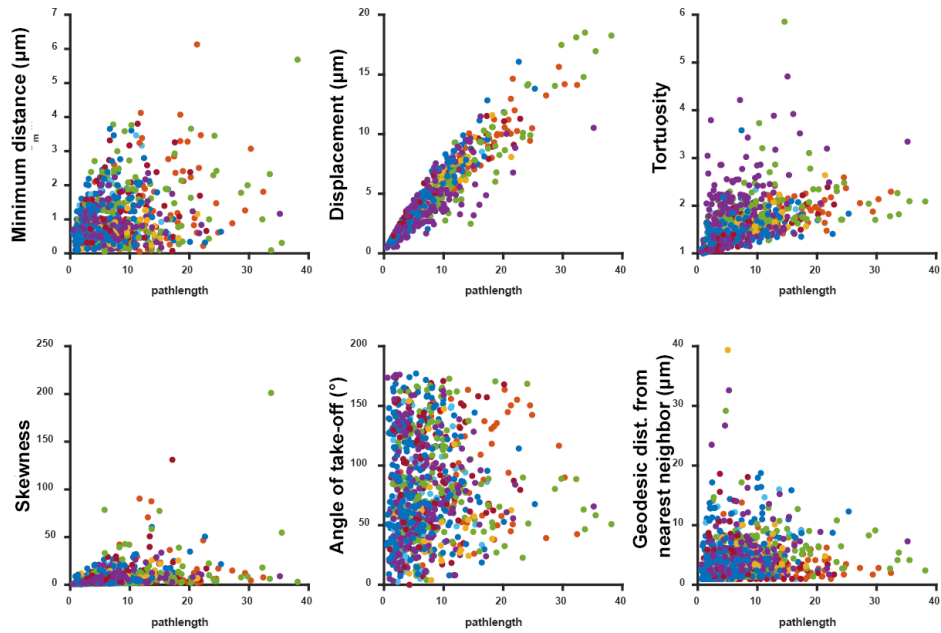

Supplementary Figure 27. Correlation statistics of physical parameters obtained from 3D images of mouse kidneys, for reacher and stayer clusters respectively (see also Figure 7).

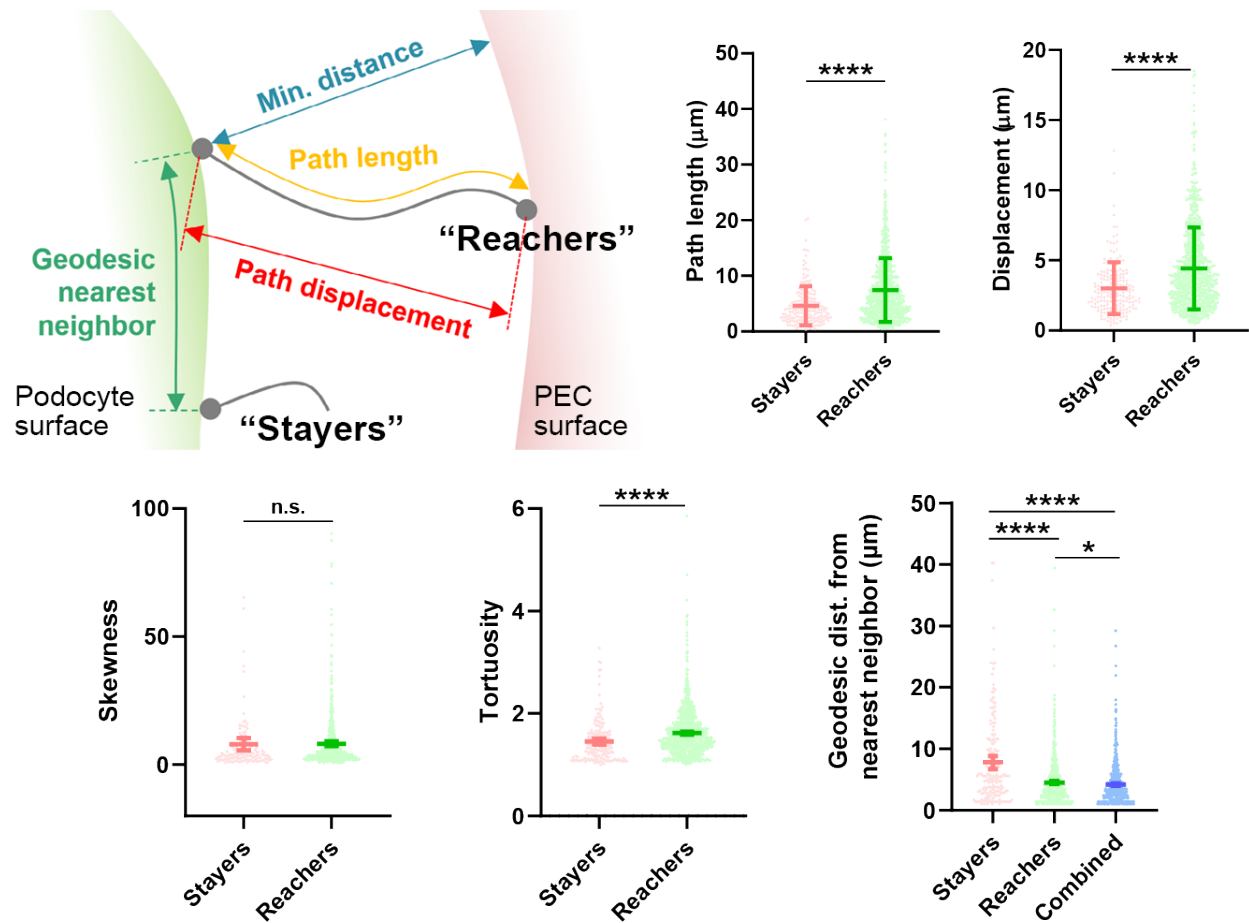

Supplementary Figure 28. Comparison of morphological and spatial parameters between stayers and reachers clusters obtained from 3D images of mouse kidneys (\*\*\*\*:  $p < 0.0001$ ).



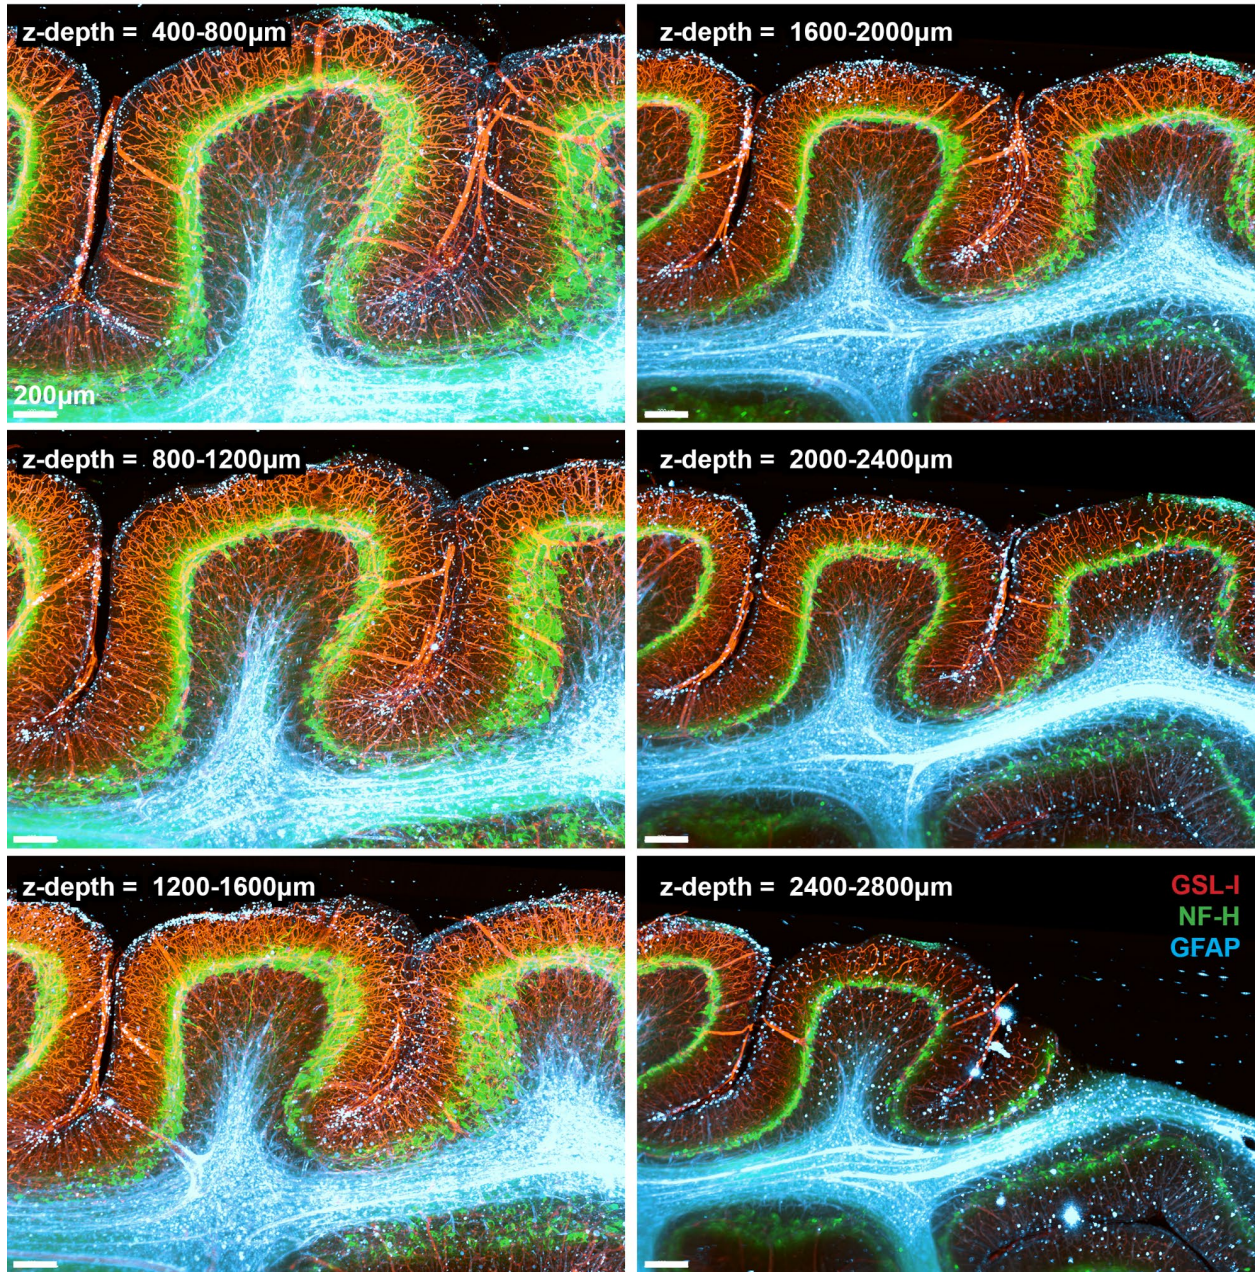

Supplementary Figure 29. Series of Z-projections of the 4mm × 8mm × 3mm human cerebellum triplex stained for vessels (with *Griffonia simplicifolia* lectin I, GSL-I, in red), neurofilaments (NF-H, in green), and astrocytes (GFAP, in blue).



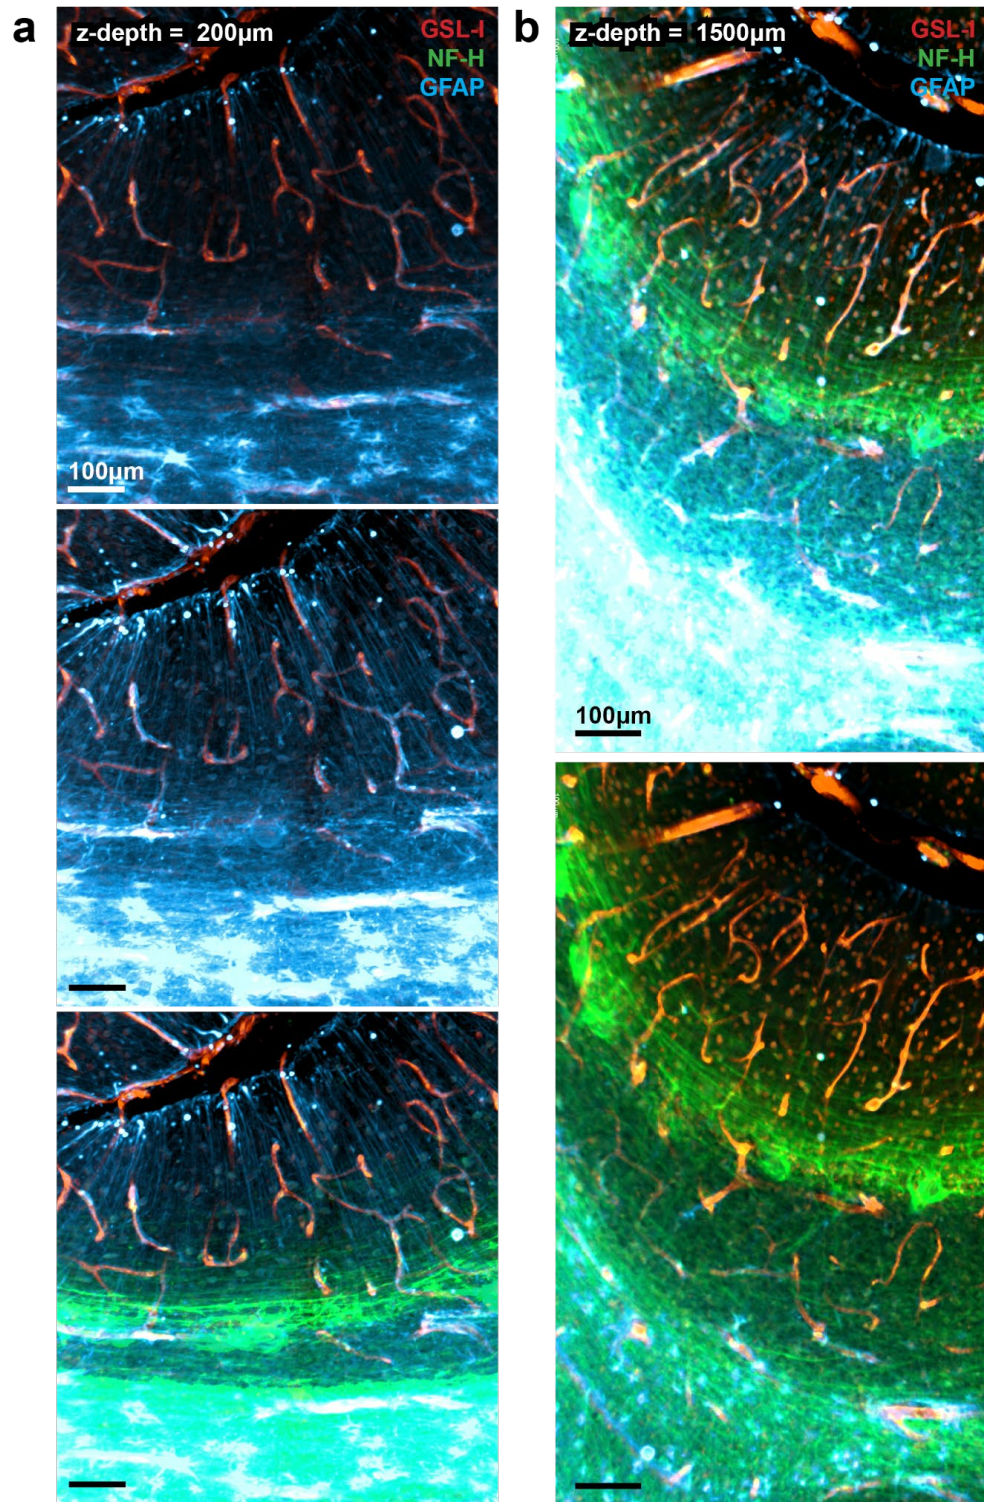

**Supplementary Figure 30. High-resolution optical sections of the 3D cerebellum tissue volume.** Zoomed-in view of the light-sheet microscopy image in **Figure 8**. Showing details such as astrocytic endfeet around blood vessels, Bergmann glia processes, and neurofilament fibres in all 3 layers at different z-depths. The images were rendered in different dynamic ranges to facilitate visualization of one layer over the other.

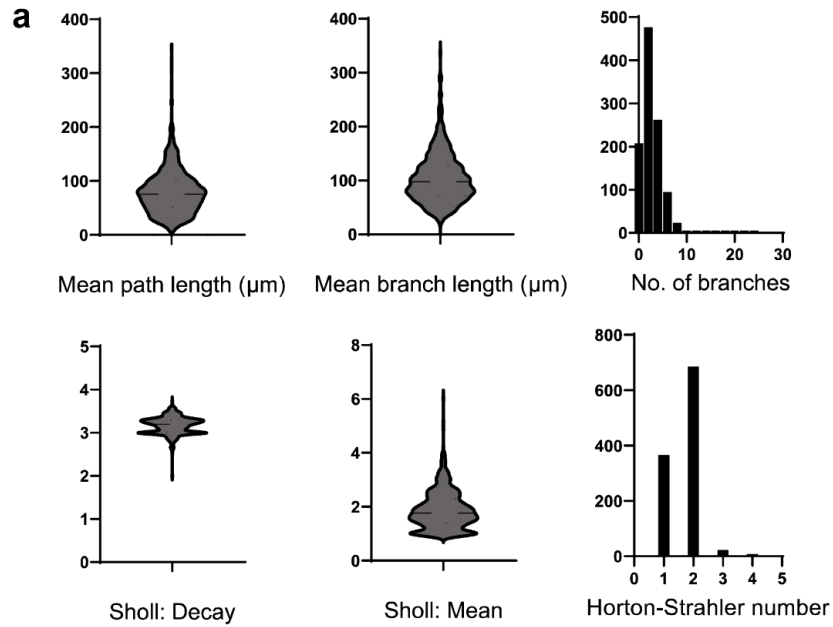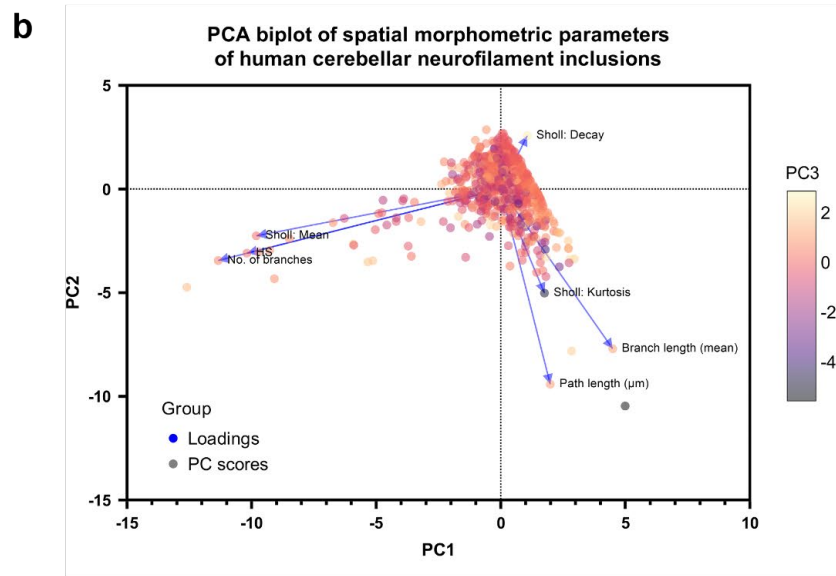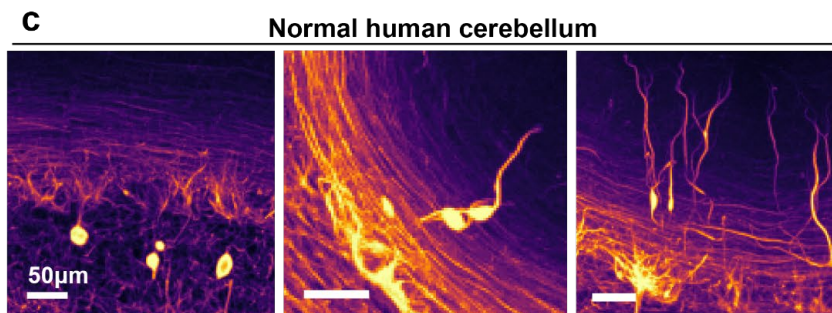

**Supplementary Figure 31. Morphometric analysis and preliminary characterisation of human cerebellar NF-H-intense inclusions.** **a** Descriptive statistics of all filaments in the 1 sample from **Fig. 8**. **b** principle component analysis with selected parameters (see also **Figure 8**). **c** Examples of similar inclusions are found in normal human cerebellar tissues.

## Supplementary Tables

**Supplementary Table 1.** Antibody penetration exponential decay constant of benchmarking experiment using mouse hemi-brains as an estimate of signal inhomogeneity.

|                      | Inhomogeneity, $\tau \times 10^3$ (confidence interval) |
|----------------------|---------------------------------------------------------|
| <b>INSIHGT</b>       | 0.301 (0.27, 0.33)                                      |
| <b>CUBIC-HV</b>      | 1.11 (1.01, 1.22)                                       |
| <b>eFLASH</b>        | 17.4 (18.6, 16.3)                                       |
| <b>iDISCO</b>        | 6.83 (8.59, 5.07)                                       |
| <b>SHANEL</b>        | 2.20 (2.29, 2.10)                                       |
| <b>SWITCH-mELAST</b> | 3.65 (2.91, 4.39)                                       |

**Supplementary Table 2.** List of antibodies tested with INSIHGT. Abbreviations for species: Ap: alpaca, Ck: chicken, Gp: guinea pig, Gt: goat, Ms: mouse, Hu: human, Rb: rabbit, Rt: rat, Sh: sheep.

| Supplier   | Cat. no.      | Antigen              | Host | Tested tissue(s) | Compatible |
|------------|---------------|----------------------|------|------------------|------------|
| Santa cruz | sc-365529     | 11bHSD2              | Ms   | Ms brain         | No         |
| Abclonal   | A12391        | AIF1/IBA1            | Rb   | Ms brain         | No         |
| DSHB       | N106/65       | ANKG                 | Ms   | Ms brain         | No         |
| Abclonal   | A2887         | AQP4                 | Rb   | Ms brain         | No         |
| Abclonal   | A12289        | beta-tubulin         | Rb   | Ms brain         | No         |
| Abclonal   | A18275        | CARTPT               | Rb   | Ms brain         | No         |
| SantaCruz  | sc-166940     | c-Fos                | Ms   | Ms brain         | No         |
| DSHB       | K55/7         | ChIP1                | Ms   | Ms brain         | No         |
| Aves       | CNP           | CNP1                 | Ck   | Ms brain         | No         |
| Abclonal   | A18028        | Cry1                 | Rb   | Ms brain         | No         |
| Abclonal   | A3019         | CSF1R                | Rb   | Ms brain         | No         |
| Abcam      | ab216588      | Cux2                 | Rb   | Ms brain         | No         |
| Sigma      | HPA002130     | DBH                  | Rb   | Ms brain         | No         |
| Sigma      | HPA001733     | DLG3                 | Rb   | Ms brain         | No         |
| Abclonal   | A12930        | DRD2                 | Rb   | Ms brain         | No         |
| Abclonal   | A1556         | DRD3                 | Rb   | Ms brain         | No         |
| DSHB       | Mab3F52       | GLP1R                | Ms   | Ms brain         | No         |
| DSHB       | L21/32        | GRIA2                | Ms   | Ms brain         | No         |
| Abclonal   | A5465         | HDC                  | Rb   | Ms brain         | No         |
| Abcam      | ab5076        | Iba1                 | Gt   | Ms brain         | No         |
| Abclonal   | A0303         | IGF1                 | Rb   | Ms brain         | No         |
| Abcam      | ab133474      | LRRK2                | Rb   | Ms kidney        | No         |
| Abclonal   | A1664         | MBP                  | Rb   | Ms brain         | No         |
| SYSY       | 260 308       | NET/SLC6A2           | Gp   | Ms brain         | No         |
| AbClonal   | A3048         | NPHS1                | Rb   | Ms kidney        | No         |
| Abcam      | ab50339       | NPHS2                | Rb   | Ms kidney        | No         |
| Abclonal   | A12814        | Olig2                | Rb   | Ms brain         | No         |
| Abclonal   | A20009        | PLP1                 | Rb   | Ms brain         | No         |
| Sigma      | P0372         | Podocin              | Rb   | Ms kidney        | No         |
| Abclonal   | A14171        | SERT/SLC6A4          | Rb   | Hu brain         | No         |
| Abclonal   | A2799         | SLC18A2/VMAT2        | Rb   | Ms brain         | No         |
| DSHB       | PCRP-SOX2-1B3 | SOX2                 | Ms   | Ms brain         | No         |
| Sigma      | AMab91108     | TPH2                 | Ms   | Hu brain         | No         |
| Abclonal   | A14472        | TRH                  | Rb   | Ms brain         | No         |
| Sigma      | AMAB91081     | VGLUT2               | Ms   | Hu brain         | No         |
| Sigma      | S5545         | 5-HT                 | Rb   | Ms brain         | Yes        |
| Immusmol   | IS040         | 5-HT                 | Ms   | Ms brain         | Yes        |
| Abclonal   | A7255         | Acetyl-Histone-H3-K9 | Rb   | Ms testis        | Yes        |

|                     |              |                          |    |                      |     |
|---------------------|--------------|--------------------------|----|----------------------|-----|
| Abclonal            | A2525        | ADAMTS4                  | Rb | Ms brain             | Yes |
| Abclonal            | A1471        | ADRA1A                   | Rb | Ms brain             | Yes |
| Abclonal            | A2809        | ADRA2A                   | Rb | Ms brain             | Yes |
| Abclonal            | A16334       | ADRB1                    | Rb | Ms brain             | Yes |
| Abclonal            | A2048        | ADRB2                    | Rb | Ms brain             | Yes |
| Abclonal            | A12192       | AGMAT                    | Rb | Ms brain             | Yes |
| Abclonal            | A8044        | AGRP                     | Rb | Ms brain             | Yes |
| Abclonal            | A15637       | Agt                      | Rb | Ms brain             | Yes |
| Abclonal            | A12326       | Agt                      | Rb | Ms brain             | Yes |
| Rockland            | 600-101-HB65 | ALDH1L1                  | Gt | Ms brain             | Yes |
| Abcam               | ab56777      | ALDH1L1                  | Ms | Ms brain             | Yes |
| Proteintech         | 17390-1-AP   | ALDH1L1                  | Rb | Ms brain             | Yes |
| SYSY                | 278 102      | ALDH1L1                  | Rb | Ms brain             | Yes |
| Abclonal            | A11618       | ALDOC                    | Rb | Ms brain             | Yes |
| SYSY                | 464 004      | Aldolase C               | Gp | Ms brain             | Yes |
| Abclonal            | A13354       | Alpha synuclein          | Rb | Hu brain             | Yes |
| Abclonal            | A20407       | Alpha synuclein          | Rb | Hu brain             | Yes |
| BD                  | 610787       | Alpha synuclein          | Ms | Hu brain             | Yes |
| Abcam               | ab184674     | Alpha synuclein<br>pS129 | Ms | Hu brain             | Yes |
| SYSY                | 386 006      | Ankyrin G                | Ck | Ms brain             | Yes |
| Abclonal            | A4195        | AQP1                     | Rb | Ms kidney            | Yes |
| Abclonal            | A16209       | AQP2                     | Rb | Ms kidney            | Yes |
| SYSY                | 429 006      | AQP4                     | Ck | Ms brain             | Yes |
| SYSY                | 429 004      | AQP4                     | Gp | Hu brain             | Yes |
| Alomone Labs        | AQP-005      | AQP5                     | Rb | Ms lacrimal<br>gland | Yes |
| Santa cruz          | sc-17839     | Arc                      | Ms | Ms brain             | Yes |
| Synaptic<br>systems | 156 003      | Arc                      | Rb | Ms brain             | Yes |
| Abclonal            | A1223        | ARHGAP25                 | Rb | Ms brain             | Yes |
| Invitrogen          | MA1-06110    | aSMA                     | Ms | Ms & Hu<br>kidney    | Yes |
| Abclonal            | A17910       | aSMA                     | Rb | Ms kidney            | Yes |
| Progen              | 690001       | aSMA                     | Rb | Ms & Hu<br>kidney    | Yes |
| Abclonal            | A11217       | ATP5A1                   | Rb | Ms kidney            | Yes |
| Abclonal            | A4873        | BDNF                     | Rb | Ms brain             | Yes |
| Abcam               | ab78078      | bIIIITub                 | Ms | Hu brain             | Yes |
| Abcam               | ab11862      | C3                       | Rt | Ms brain             | Yes |
| Abclonal            | A1212        | CA3                      | Rb | Ms brain             | Yes |
| SYSY                | 214 011      | Calbindin                | Ms | Ms brain             | Yes |
| AbClonal            | A4284        | Calbindin                | Rb | Ms brain             | Yes |
| CST                 | 13176S       | Calbindin                | Rb | Ms brain             | Yes |
| Swant               | CB300        | Calbindin D28K           | Ms | Ms brain             | Yes |
| Abclonal            | A11979       | CALCRL                   | Rb | Ms brain             | Yes |



|            |                 |                   |    |                  |     |
|------------|-----------------|-------------------|----|------------------|-----|
| R&D        | AF5065          | Calretinin        | Gt | Ms brain         | Yes |
| Abclonal   | A0198           | CaMKII            | Rb | Ms brain         | Yes |
| Origene    | TA808345        | CaMKIIb           | Ms | Ms brain         | Yes |
| DSHB       | PCRP-CAMKK2-1H7 | CAMKK2b           | Ms | Ms brain         | Yes |
| DSHB       | K65/35-s        | CASPR/Neurexin IV | Ms | Ms brain         | Yes |
| SYSY       | 258 106         | CB1R              | Ck | Ms brain         | Yes |
| SYSY       | 438 004         | CCK               | Gp | Ms brain         | Yes |
| Abclonal   | A1759           | CCK               | Rb | Ms brain         | Yes |
| SYSY       | HS-360 117      | CD4               | Rt | Ms spleen        | Yes |
| SYSY       | HS-384 117      | CD11b/ITGAM       | Rt | Ms colon         | Yes |
| Abclonal   | A1508           | CD11c/ITGAX       | Rb | Ms colon         | Yes |
| Abclonal   | A5662           | CD13              | Rb | Ms brain         | Yes |
| Abclonal   | A11669          | CD13              | Rb | Ms brain         | Yes |
| Jotbody    | AP01388a        | CD19              | Rb | Ms spleen        | Yes |
| Abclonal   | A12711          | CD133             | Rb | Ms kidney        | Yes |
| Abclonal   | A4900           | CD31-PECAM1       | Rb | Ms kidney, brain | Yes |
| Abclonal   | A0761           | CD34              | Rb | Ms kidney        | Yes |
| LSBio      | LS-C359273      | CD44              | Ms | Ms kidney        | Yes |
| Abclonal   | A15995          | CENP-A            | Rb | Ms testis        | Yes |
| Abclonal   | A16641          | c-Fos             | Rb | Ms brain         | Yes |
| Abclonal   | A0236           | c-Fos             | Rb | Ms brain         | Yes |
| CST        | 2250S           | c-Fos             | Rb | Ms brain         | Yes |
| SYSY       | 226 017         | c-Fos             | Rt | Ms brain         | Yes |
| Abclonal   | A5542           | CGRP              | Rb | Ms brain         | Yes |
| Millipore  | AB144           | ChAT              | Gt | Ms brain         | Yes |
| Invitrogen | MA3-31382       | ChAT              | Ms | Ms brain         | Yes |
| Abclonal   | A13244          | ChAT              | Rb | Ms brain         | Yes |
| SYSY       | 297 013         | ChAT              | Rb | Ms brain         | Yes |
| DSHB       | K60/73          | ChIP2             | Ms | Ms brain         | Yes |
| DSHB       | K66/38          | ChIP3             | Ms | Ms brain         | Yes |
| SYSY       | 223 017         | CHRM2             | Rt | Ms brain         | Yes |
| Abclonal   | A1602           | CHRM3             | Rb | Ms brain         | Yes |
| Abclonal   | A3792           | CLCNKA            | Rb | Ms kidney        | Yes |
| SYSY       | 355 006         | CNP1              | Ck | Ms brain         | Yes |
| SYSY       | 355 004         | CNP1              | Gp | Ms brain         | Yes |
| Abclonal   | A20483          | CTIP/BCL11B       | Rb | Ms brain         | Yes |
| Abclonal   | A2160           | CYP2E1            | Rb | Ms liver         | Yes |
| Abclonal   | A2544           | CYP3A4            | Rb | Ms liver         | Yes |
| SYSY       | 382 003         | DARPP32           | Rb | Ms brain         | Yes |
| Millipore  | MAB369          | DAT               | Rb | Ms brain         | Yes |
| SYSY       | 284 006         | DAT               | Ck | Ms brain         | Yes |
| SYSY       | 284 003         | DAT/SLC6A3        | Rb | Ms brain         | Yes |
| Abcam      | ab189991        | DBH               | Gt | Ms brain         | Yes |
| Abclonal   | A13971          | DBH               | Rb | Ms brain         | Yes |

|            |                |            |    |                    |     |
|------------|----------------|------------|----|--------------------|-----|
| Invitrogen | PA3-925        | DBH        | Sh | Ms brain           | Yes |
| Abclonal   | A3828          | DDC        | Rb | Ms brain           | Yes |
| Sigma      | HPA017742      | DDC        | Rb | Ms brain           | Yes |
| Abcam      | ab167612       | DeltaNp63  | Ms | Hu colon cancer    | Yes |
| Immusmol   | IS1005         | Dopamine   | Rb | Ms brain           | Yes |
| Abclonal   | A2893          | DRD1       | Rb | Ms brain           | Yes |
| SYSY       | 376 205        | DRD2       | Gp | Ms brain           | Yes |
| Millipore  | 205604         | E-Cadherin | Rt | Ms lacrimal gland  | Yes |
| Abcam      | ab41621        | EAAT2      | Rb | Ms brain           | Yes |
| Abclonal   | A2722          | EGR1       | Rb | Ms brain           | Yes |
| Abcam      | ab204991       | ELAVL2     | Rb | Ms brain           | Yes |
| Invitrogen | MA5-26826      | FEZF2      | Ms | Ms brain           | Yes |
| Abcam      | ab205606       | Flag       | Rb | Ms brain           | Yes |
| DSHB       | PCRP-FOXA2-3A2 | FOXA2      | Ms | Ms brain           | Yes |
| DSHB       | PCRP-FOXP4-1G7 | FOXP4      | Ms | Ms brain           | Yes |
| Immusmol   | IS1036         | GABA       | Ck | Ms brain           | Yes |
| Sigma      | A2052          | GABA       | Rb | Ms brain           | Yes |
| Sigma      | HPA055746      | GABARA1    | Rb | Ms brain           | Yes |
| SYSY       | 322 102        | GABBR1     | Rb | Ms brain           | Yes |
| SYSY       | 322 203        | GABBR2     | Rb | Ms brain           | Yes |
| SYSY       | 224 205        | GABRA1     | Gp | Ms brain           | Yes |
| SYSY       | 224 103        | GABRA2     | Rb | Ms brain           | Yes |
| SYSY       | 224 303        | GABRA3     | Rb | Ms brain           | Yes |
| DSHB       | GABRA4-R24     | GABRA4     | Rb | Ms brain           | Yes |
| SYSY       | 224 503        | GABRA5     | Rb | Ms brain           | Yes |
| SYSY       | 224 603        | GABRA6     | Rb | Ms brain           | Yes |
| SYSY       | 224 703        | GABRB1     | Rb | Ms brain           | Yes |
| SYSY       | 224 803        | GABRB2     | Rb | Ms brain           | Yes |
| SYSY       | 224 403        | GABRB3     | Rb | Ms brain           | Yes |
| SYSY       | 224 003        | GABRG2     | Rb | Ms brain           | Yes |
| DSHB       | GABRG3-R21     | GABRG3     | Rb | Ms brain           | Yes |
| Abcam      | ab111070       | GAD1/2     | Rb | Ms brain           | Yes |
| Abclonal   | A0971          | GAD2       | Rb | Ms brain           | Yes |
| Abclonal   | A14609         | GCG        | Rb | Ms brain, pancreas | Yes |
| SantaCruz  | sc-25311       | Gephyrin   | Ms | Ms & Hu brain      | Yes |
| Aves       | GFAP           | GFAP       | Ck | Ms brain           | Yes |
| Dako       | M0761          | GFAP       | Ms | Hu brain           | Yes |
| Invitrogen | 13-0300        | GFAP       | Rt | Ms & Hu brain      | Yes |
| Abcam      | ab252881       | GFP        | Gt | Ms brain           | Yes |
| Abcam      | ab6673         | GFP        | Rt | Ms brain           | Yes |
| SYSY       | N0304          | GFP        | Ap | Ms brain           | Yes |

|            |           |                        |    |                       |     |
|------------|-----------|------------------------|----|-----------------------|-----|
| Invitrogen | PA5-47769 | GFRAL                  | Sh | Ms brain              | Yes |
| Abclonal   | A4981     | GLP1                   | Rb | Ms brain,<br>pancreas | Yes |
| DSHB       | Mab7F38   | GLP1R                  | Ms | Ms brain              | Yes |
| Abclonal   | A8547     | GLP1R                  | Rb | Ms brain              | Yes |
| SYSY       | 367 005   | GLUL                   | Gp | Ms liver              | Yes |
| SYSY       | 367 011   | GLUL                   | Ms | Ms liver              | Yes |
| Immusmol   | IS1001    | L-Glutamate            | Rb | Ms brain              | Yes |
| SYSY       | 456 003   | Glutaminase 1          | Rb | Ms brain              | Yes |
| Immusmol   | IS1034    | Glycine                | Rb | Ms brain              | Yes |
| Abclonal   | A11408    | GM130                  | Rb | Ms kidney             | Yes |
| Abclonal   | A5625     | GNRH1                  | Rb | Ms brain              | Yes |
| SYSY       | 182 011   | GRIA1                  | Ms | Ms brain              | Yes |
| AbClonal   | A1826     | GRIA1                  | Rb | Ms brain              | Yes |
| SYSY       | 182 111   | GRIA2                  | Ms | Ms brain              | Yes |
| SYSY       | 182 203   | GRIA3                  | Rb | Ms brain              | Yes |
| SYSY       | 182 303   | GRIA4                  | Rb | Ms brain              | Yes |
| SYSY       | 180 313   | GRIK1                  | Rb | Ms brain              | Yes |
| AbClonal   | A9722     | GRIK2                  | Rb | Ms brain              | Yes |
| SYSY       | 180 003   | GRIK2                  | Rb | Ms brain              | Yes |
| SYSY       | 180 203   | GRIK3                  | Rb | Ms brain              | Yes |
| SYSY       | 180 103   | GRIK5                  | Rb | Ms brain              | Yes |
| SYSY       | 114 011   | GRIN1                  | Ms | Ms brain              | Yes |
| DSHB       | 327/95    | GRIN2A                 | Ms | Ms brain              | Yes |
| SYSY       | 244 003   | GRIN2A/B               | Rb | Ms brain              | Yes |
| SYSY       | 244 115   | GRIN2B                 | Gp | Ms brain              | Yes |
| DSHB       | N59/36    | GRIN2B                 | Ms | Ms brain              | Yes |
| AbClonal   | A3056     | GRIN2B                 | Rb | Ms brain              | Yes |
| SYSY       | 191 103   | GRM2                   | Rb | Ms brain              | Yes |
| SYSY       | 191 203   | GRM7                   | Rb | Ms brain              | Yes |
| AbClonal   | A2964     | GRM8                   | Rb | Ms brain              | Yes |
| Abclonal   | A7253     | H3K27ac                | Rb | Ms testis             | Yes |
| Abclonal   | A2361     | H3K27me                | Rb | Ms testis             | Yes |
| Abclonal   | A2362     | H3K27me2               | Rb | Ms testis             | Yes |
| Abclonal   | A2363     | H3K27me3               | Rb | Ms testis             | Yes |
| Abclonal   | A7255     | H3K9Ac                 | Rb | Ms testis             | Yes |
| Abclonal   | A3156     | H3R8me                 | Rb | Ms testis             | Yes |
| Abclonal   | A3157     | H3R8me2-<br>asymmetric | Rb | Ms testis             | Yes |
| Abclonal   | A21207    | H3R8me2-symmetric      | Rb | Ms testis             | Yes |
| DSHB       | N70/28    | HCN1                   | Ms | Ms brain              | Yes |
| DSHB       | N114/10   | HCN4                   | Ms | Ms brain              | Yes |
| Immunsmol  | IS1039    | Histamine              | Rb | Ms brain              | Yes |
| Abclonal   | A3692     | Histone H2A            | Rb | Ms brain, testis      | Yes |
| Abclonal   | A17813    | Histone H2A.V          | Rb | Ms testis             | Yes |
| Abclonal   | A12442    | Histone H2A.Z          | Rb | Ms testis             | Yes |

|            |                    |              |    |                     |     |
|------------|--------------------|--------------|----|---------------------|-----|
| Abclonal   | A11540             | Histone H2AX | Rb | Ms testis           | Yes |
| Abclonal   | A4835              | Histone H3.3 | Rb | Ms testis           | Yes |
| Abclonal   | A11252             | HLA-DQA1     | Rb | Ms spleen,<br>colon | Yes |
| Abclonal   | A8077              | HSD11B2      | Rb | Ms brain            | Yes |
| Abclonal   | A2801              | HTR1A        | Rb | Ms brain            | Yes |
| Abclonal   | A18285             | HTR1B        | Rb | Ms brain            | Yes |
| Abclonal   | A14743             | HTR1F        | Rb | Ms brain            | Yes |
| Abclonal   | A20538             | HTR2A        | Rb | Ms brain            | Yes |
| Immunostar | 24288              | HTR2A        | Rb | Ms brain            | Yes |
| AbClonal   | A5647              | HTR3A        | Rb | Ms brain            | Yes |
| Abclonal   | A2802              | HTR4         | Rb | Ms brain            | Yes |
| Abclonal   | A19706             | HTR7         | Rb | Ms brain            | Yes |
| SYSY       | 234 009            | Iba1         | Ck | Ms brain            | Yes |
| Wako       | 019-19741          | Iba1         | Rb | Ms brain            | Yes |
| SYSY       | 117 002            | IP3R type 1  | Rb | Ms brain            | Yes |
| R&D        | AF599              | Jagged1      | Gt | Ms & Hu brain       | Yes |
| DSHB       | L18A/3             | KCNMB4       | Ms | Ms brain            | Yes |
| Abclonal   | A17061             | KEAP1        | Rb | Ms brain            | Yes |
| DSHB       | N112B/14           | Kir2.1       | Ms | Ms brain            | Yes |
| Abclonal   | A1024              | KRT8/TROMA-1 | Rb | Ms skin             | Yes |
| DSHB       | SP2/0              | KRT8/TROMA-1 | Rt | Ms skin             | Yes |
| Abclonal   | A0247              | KRT19        | Rb | Ms liver            | Yes |
| DSHB       | K36/15             | Kv1.1        | Ms | Ms brain            | Yes |
| DSHB       | K14/16             | Kv1.2        | Ms | Ms brain            | Yes |
| DSHB       | K89/34             | Kv2.1        | Ms | Ms brain            | Yes |
| DSHB       | K37/89             | Kv2.2        | Ms | Ms brain            | Yes |
| DSHB       | K57/1              | Kv4.2        | Ms | Ms brain            | Yes |
| DSHB       | K9/40              | Kvb1.1       | Ms | Ms brain            | Yes |
| DSHB       | K17/70             | Kvb2         | Ms | Ms brain            | Yes |
| AbClonal   | A19970             | Laminin b1   | Rb | Ms kidney           | Yes |
| Abclonal   | A2999              | LEPR         | Rb | Ms brain            | Yes |
| Abclonal   | A7045              | macroH2A.1   | Rb | Ms testis           | Yes |
| Abclonal   | A2572              | MAP2         | Rb | Ms brain            | Yes |
| SYSY       | 188 011BT          | MAP2         | Ms | Ms brain            | Yes |
| Abcam      | ab24233            | MC4R         | Rb | Ms brain            | Yes |
| Abclonal   | A10228             | MC4R         | Rb | Ms brain            | Yes |
| Abclonal   | A3013              | MCT1/SLC16A1 | Rb | Ms brain &<br>colon | Yes |
| AbClonal   | A3673              | mGluR2       | Rb | Ms brain            | Yes |
| Abcam      | ab206486           | Myc          | Rt | Ms brain            | Yes |
| DSHB       | PCR-P-MYCN-<br>1A9 | MYCN         | Ms | Ms brain            | Yes |
| AbClonal   | A11683             | NaK-ATPase   | Rb | Ms kidney           | Yes |
| DSHB       | K69/3              | Nav1.2       | Ms | Ms brain            | Yes |
| DSHB       | K87A/10            | Nav1.6       | Ms | Ms brain            | Yes |



|            |               |                           |    |                 |     |
|------------|---------------|---------------------------|----|-----------------|-----|
| Abclonal   | A1421         | NET/SLC6A2                | Rb | Ms brain        | Yes |
| SYSY       | 260 008       | NET/SLC6A2                | Rb | Ms brain        | Yes |
| Abcam      | ab104224      | NeuN                      | Ms | Ms & Hu brain   | Yes |
| Abclonal   | A19086        | NeuN                      | Rb | Ms brain        | Yes |
| AbClonal   | A19084        | Neurofilament-H           | Rb | Ms & Hu brain   | Yes |
| Sigma      | N4142         | Neurofilament-H           | Rb | Ms & Hu brain   | Yes |
| AbClonal   | A0257         | Neurofilament-L           | Rb | Ms brain        | Yes |
| AbClonal   | A19085        | Neurofilament-M           | Rb | Ms brain        | Yes |
| Abclonal   | A12326        | Neurotensin               | Rb | Ms brain        | Yes |
| AbClonal   | A11699        | NMDAR1                    | Rb | Ms brain        | Yes |
| AbClonal   | A0924         | NMDAR2A                   | Rb | Ms brain        | Yes |
| SYSY       | 432 006       | nNOS                      | Ck | Ms brain        | Yes |
| SYSY       | 432 005       | nNOS                      | Gp | Ms brain        | Yes |
| Abclonal   | A8319         | NOL3/Arc                  | Rb | Ms brain        | Yes |
| Immusmol   | IS1042        | L-Noradrenaline           | Rb | Ms brain        | Yes |
| Invitrogen | PA5-39300     | NPAS4                     | Rb | Ms brain        | Yes |
| SYSY       | 394 006       | NPY                       | Ck | Ms brain        | Yes |
| Abclonal   | A3178         | NPY                       | Rb | Ms brain        | Yes |
| DSHB       | PCRP-NRF1-3D4 | NRF1                      | Ms | Ms brain        | Yes |
| Abclonal   | AP1133        | NRF2-pS40                 | Rb | Ms brain        | Yes |
| AbClonal   | A2029         | NT5E                      | Rb | Ms liver        | Yes |
| Abclonal   | A12326        | NTS                       | Rb | Ms brain        | Yes |
| Millipore  | AB3704        | Orexin A                  | Rb | Ms brain        | Yes |
| Jotbody    | 0112          | p53                       | Ap | Hu colon        | Yes |
| DSHB       | N419/40       | Pan-Na.v1                 | Ms | Ms brain        | Yes |
| Abcam      | ab18257       | PARK7                     | Rb | Ms brain        | Yes |
| Abcam      | ab179812      | Parkin                    | Rb | Ms kidney       | Yes |
| DSHB       | PCRP-PAX2-1A7 | Pax2                      | Ms | Ms brain        | Yes |
| SYSY       | 153 011       | Pax6                      | Ms | Ms brain        | Yes |
| SYSY       | 480 004       | PCP4                      | Gp | Ms brain        | Yes |
| AbClonal   | A2103         | PDGFRA                    | Rb | Ms kidney       | Yes |
| AbClonal   | A19531        | PDGFRB                    | Rb | Ms kidney       | Yes |
| Abclonal   | AP1022        | PDH-pS293                 | Rb | Ms brain        | Yes |
| CST        | 37115         | PDH-pS293                 | Rb | Ms brain        | Yes |
| Jotbody    | 0002          | PD-L1                     | Ap | Hu colon cancer | Yes |
| Abclonal   | A5830         | PDYN                      | Rb | Ms brain        | Yes |
| Abclonal   | AP0687        | Phospho-Histone-H2AX-S139 | Rb | Ms testis       | Yes |
| Abclonal   | AP0093        | Phospho-Histone-H3-T11    | Rb | Ms testis       | Yes |
| CST        | 4370S         | Phospho-p44/42 MAPK       | Rb | Ms brain        | Yes |
| Invitrogen | 44-923G       | Phospho-                  | Rb | Ms brain        | Yes |

|            |                 |                  |    |                   |     |
|------------|-----------------|------------------|----|-------------------|-----|
|            |                 | S6(S244,S247)    |    |                   |     |
| Abclonal   | A9655           | Phox2b           | Rb | Ms brain          | Yes |
| Abcam      | ab186303        | PINK1            | Ms | Ms kidney         | Yes |
| Abclonal   | A10200          | PODXL            | Rb | Ms kidney         | Yes |
| NeuroMab   | 75-028          | PSD95            | Ms | Ms brain          | Yes |
| SYSY       | 195 004         | PVALB            | Gp | Ms brain          | Yes |
| Abcam      | ab32895         | PVALB            | Gt | Ms brain          | Yes |
| Abclonal   | A19098          | PVALB            | Rb | Ms brain          | Yes |
| Invitrogen | PA1-933         | PVALB            | Rb | Ms & Hu brain     | Yes |
| Abclonal   | A19710          | SOX9             | Rb | Ms testis         | Yes |
| Abclonal   | A10029          | RBP1             | Rb | Ms liver          | Yes |
| Abclonal   | A17936          | RELN             | Rb | Ms brain          | Yes |
| Abclonal   | A1585           | Renin            | Rb | Ms kidney         | Yes |
| Abcam      | ab125244        | RFP              | Ms | Ms brain & kidney | Yes |
| Abclonal   | A19753          | RORbeta          | Rb | Ms brain          | Yes |
| Enzo       | ENZ-ABS307-0100 | S100b            | Rb | Ms brain          | Yes |
| DSHB       | N19/2           | SAP102           | Ms | Ms brain          | Yes |
| SYSY       | 327 003         | SATB2            | Rb | Ms brain          | Yes |
| Abclonal   | A15097          | scnn1g           | Rb | Ms kidney         | Yes |
| SYSY       | 340 004         | SERT             | Gp | Ms brain          | Yes |
| SYSY       | 340 004         | SERT/SLC6A4      | Gp | Ms brain          | Yes |
| Abclonal   | A12999          | slc12a1          | Rb | Ms kidney         | Yes |
| Abclonal   | A18382          | slc12a3          | Rb | Ms kidney         | Yes |
| Abclonal   | A15991          | slc14a1          | Rb | Ms kidney         | Yes |
| Abclonal   | A13208          | slc14a2          | Rb | Ms kidney         | Yes |
| Abclonal   | A15177          | SLC17A6 (VGLUT2) | Rb | Ms brain          | Yes |
| Abclonal   | A12879          | SLC17A7          | Rb | Ms brain          | Yes |
| Abclonal   | A2799           | SLC18A2          | Rb | Ms brain          | Yes |
| LSBio      | LS-B6724        | SLC1A2           | Ms | Ms brain          | Yes |
| Abclonal   | A1814           | SLC22A6          | Rb | Ms kidney         | Yes |
| Abclonal   | A20271          | SLC5A2           | Rb | Ms kidney         | Yes |
| Invitrogen | PA5-101896      | SLC5A3           | Rb | Ms kidney         | Yes |
| Abclonal   | A17532          | SLC9A3           | Rb | Ms kidney         | Yes |
| AbClonal   | A19576          | SOD2             | Rb | Ms kidney         | Yes |
| Abcam      | ab97959         | SOX2             | Rb | Ms brain          | Yes |
| SYSY       | 347 003         | SOX2             | Rb | Ms brain          | Yes |
| SYSY       | 366 006         | SST              | Ck | Ms brain          | Yes |
| AbClonal   | A9274           | SST              | Rb | Ms brain          | Yes |
| Millipore  | MAB354          | SST              | Rt | Ms brain          | Yes |
| R&D        | MAB2358         | SST              | Gt | Ms brain          | Yes |
| Novus      | NB300-104       | Synapsin I       | Rb | Ms brain          | Yes |
| Abclonal   | A13550          | Tac1             | Rb | Ms brain          | Yes |
| Abclonal   | A6312           | TAC3             | Rb | Ms brain          | Yes |
| Abcam      | A121690         | tdTomato         | Gt | Ms brain          | Yes |

|                      |            |             |    |           |     |
|----------------------|------------|-------------|----|-----------|-----|
| Abclonal             | A5865      | TFRC        | Rb | Ms kidney | Yes |
| SYSY                 | 213 104    | TH          | Gp | Ms brain  | Yes |
| Abclonal             | A0028      | TH          | Rb | Ms brain  | Yes |
| Millipore            | AB152      | TH          | Rb | Ms brain  | Yes |
| SYSY                 | 400 006    | TMEM119     | Gp | Ms brain  | Yes |
| Abcam                | ab209064   | TMEM119     | Rb | Ms brain  | Yes |
| Abclonal             | A7147      | TPH2        | Rb | Ms brain  | Yes |
| Abclonal             | A10482     | TREM2       | Rb | Ms brain  | Yes |
| DSHB                 | N67/15     | TRPC5       | Ms | Ms brain  | Yes |
| Novus<br>Biologicals | NBP1-80651 | UBAP1       | Rb | Ms brain  | Yes |
| Abclonal             | A1920      | UMOD        | Rb | Ms kidney | Yes |
| Abclonal             | A19707     | VDAC1       | Rb | Ms kidney | Yes |
| Abcam                | ab33168    | VE-Cadherin | Rb | Ms kidney | Yes |
| Abclonal             | A19607     | Vimentin    | Rb | Ms kidney | Yes |
| SYSY                 | 443 005    | VIP         | Gp | Ms brain  | Yes |
| AbClonal             | A12531     | VIP         | Rb | Ms brain  | Yes |
| Bioss                | bs-0077R   | VIP         | Rb | Ms brain  | Yes |
| AbClonal             | A1335      | VWF         | Rb | Ms kidney | Yes |
| SYSY                 | 362 003    | ZBTB20      | Rb | Ms brain  | Yes |

**Supplementary Table 3.** All tested protein-conjugating fluorophores and their compatibility with INSIHGT. For the excitation peaks, absorbance peaks were provided if the excitation peaks were unknown or not provided in the literature.

| Fluorophore name     | Excitation/Emission peak (nm) | Compatibility with INSIHGT |
|----------------------|-------------------------------|----------------------------|
| Alexa Fluor 405      | 401 / 421                     | Yes                        |
| Alexa Fluor 488      | 499 / 520                     | Yes                        |
| Atto 430LS           | 435 / 545                     | Yes                        |
| Fluorescein          | 498 / 516                     | Yes                        |
| Atto 488             | 499 / 520                     | Yes                        |
| Dylight 488          | 493 / 520                     | Yes                        |
| Atto 490LS           | 495 / 658                     | Yes                        |
| iFluor 488           | 490 / 520                     | Yes                        |
| Alexa Fluor 514      | 518 / 542                     | Yes                        |
| Alexa Fluor 532      | 534 / 553                     | Yes                        |
| Alexa Fluor 555      | 553 / 568                     | Yes                        |
| Atto 550             | 554 / 576                     | Yes                        |
| iFluor 546           | 541 / 557                     | Yes                        |
| Alexa Fluor 546      | 561 / 573                     | Yes                        |
| Alexa Fluor 568      | 578 / 603                     | Yes                        |
| Tetramethylrhodamine | 552 / 577                     | Yes                        |
| Alexa Fluor 594      | 590 / 618                     | Yes                        |
| Dylight 594          | 593 / 618                     | Yes                        |
| Alexa Fluor 647      | 650 / 671                     | Yes                        |
| Atto 647N            | 645 / 664                     | Yes                        |
| Cy5                  | 646 / 667                     | Yes                        |
| Cy5.5                | 674 / 692                     | Yes                        |
| SeTau-647            | 648 / 694                     | Yes                        |
| Dylight 649          | 651 / 672                     | Yes                        |
| iFluor 647           | 655 / 671                     | Yes                        |
| Alexa Fluor 680      | 681 / 704                     | Yes                        |
| Atto 700             | 700 / 716                     | Yes                        |
| Alexa Fluor 700      | 696 / 720                     | Yes                        |
| iFluor 700           | 690 / 710                     | Yes                        |
| Dylight 700          | 707 / 728                     | Yes                        |



**Supplementary Table 4.** Basic image acquisition parameters for all microscopy images in this study. For confocal microscopy, the objectives used are Leica HC PL APO  $\times 10/0.40$  CS2 or Leica HC PL APO 40X/1.30 Oil CS2. For MesoSPIM light-sheet microscopy, the detection was done using an Olympus MVX-ZB10 Zoombody and only the magnification during imaging was provided. For two-photon tomography, a Nikon CFI75 LWD 16X W (NA 0.8) objective was used. The “S” prefix in the Figure refers to supplementary figures.

| Figure     | Microscopy            | Excitation wavelength(s) (nm) | Objective Magnification/ Numerical aperture |
|------------|-----------------------|-------------------------------|---------------------------------------------|
| 2B         | Leica SP8 confocal    | 488, 649                      | 10x/ 0.40                                   |
| 3B         | MesoSPIM v5.1         | 633                           | 1.6x                                        |
| 3C-D       | MesoSPIM v5.1         | 488, 561, 633                 | 1.6x                                        |
| 3E-I       | MesoSPIM v5.1         | 488, 561, 633                 | 1.6x                                        |
| 3J-L       | Two-photon tomography | 780                           | 16x/ 0.8                                    |
| 4B         | Leica SP8 confocal    | 405, 649                      | 40x/ 1.30                                   |
| 4C         | Leica SP8 confocal    | 649                           | 40x/ 1.30                                   |
| 4D         | Leica SP8 confocal    | 405, 488, 561, 649            | 40x/ 1.30                                   |
| 4H         | Leica SP8 confocal    | 405, 488, 561, 649            | 40x/ 1.30                                   |
| 5B-5F      | Leica SP8 confocal    | 405, 488, 649                 | 10x/ 0.40                                   |
| 5H-I       | Two-photon tomography | 780                           | 16x/ 0.8                                    |
| 6B-C, G, I | Leica SP8 confocal    | 405, 488, 561, 649            | 10x/ 0.40                                   |
| 7A-D       | Leica SP8 confocal    | 405, 488, 561, 649            | 40x/ 1.30                                   |
| 8A-C, 8F   | MesoSPIM v5.1         | 488, 561, 633                 | 1.6x                                        |
| 8D, E      | Leica SP8 confocal    | 488, 561, 649                 | 40x/ 1.30                                   |
| S1A-B      | Leica SP8 confocal    | 405, 649                      | 40x/ 1.30                                   |
| S2         | MesoSPIM v5.1         | 488, 561                      | 1.6x                                        |
| S3B        | Leica SP8 confocal    | 405, 649                      | 40x/ 1.30                                   |

|         |                       |                    |           |
|---------|-----------------------|--------------------|-----------|
| S4B     | Leica SP8 confocal    | 488, 649           | 10x/ 0.40 |
| S6A     | Leica SP8 confocal    | 488, 649           | 10x/ 0.40 |
| S7A     | Leica SP8 confocal    | 488                | 40x/ 1.30 |
| S8      | MesoSPIM v5.1         | 488                | 1.6x      |
| S9A-C   | Two-photon tomography | 780                | 16x/ 0.8  |
| S10-S12 | Leica SP8 confocal    | 405, 488, 561, 649 | 40x/ 1.30 |
| S13     | Leica SP8 confocal    | 488, 649           | 40x/ 1.30 |
| S15     | Two-photon tomography | 780                | 16x/ 0.8  |
| S16     | Leica SP8 confocal    | 405, 488, 561, 649 | 40x/ 1.30 |
| S17A    | Leica SP8 confocal    | 488, 649           | 10x/ 0.40 |
| S17B    | Leica SP8 confocal    | 488, 649           | 40x/ 1.30 |
| S26     | MesoSPIM v5.1         | 488, 561, 633      | 3.2x      |
| S27     | MesoSPIM v5.1         | 488, 561, 633      | 3.2x      |

**Supplementary Table 5.** Basic physical chemistry characteristics of  $[\text{B}_{12}\text{H}_{12}]^{2-}$  <sup>9,14</sup>

|                                                                     |                                             |
|---------------------------------------------------------------------|---------------------------------------------|
| Ion radius                                                          | 400 pm                                      |
| $T\Delta S_{\text{struct,water}}$                                   | 14.8 kcal mol <sup>-1</sup>                 |
| $\Delta H_{\text{B}}$                                               | -2.31                                       |
| $\Delta G_{\text{hyd}}$                                             | -140 kcal mol <sup>-1</sup>                 |
| $\Delta H_{\text{hyd}}$                                             | -145                                        |
| $T\Delta S_{\text{hyd}}$                                            | -5 kcal mol <sup>-1</sup>                   |
| Polarizability                                                      | 25.7 Å <sup>3</sup> (calculated)            |
| Hydration $\Delta r$                                                | 9.6 pm (calculated)                         |
| Average number of H <sub>2</sub> O molecules in the hydration shell | 1.8 (calculated)                            |
| $\Delta_{\text{hyd}}S$                                              | -17.9 cal K <sup>-1</sup> mol <sup>-1</sup> |
| $K_{\text{a}}$ with $\alpha$ CD in water                            | 100 L mol <sup>-1</sup>                     |
| $K_{\text{a}}$ with $\beta$ CD in water                             | 200 L mol <sup>-1</sup>                     |
| $K_{\text{a}}$ with $\gamma$ CD in water                            | 2,000 L mol <sup>-1</sup>                   |

## Supplementary References

1. Jacso, T. *et al.* The Mechanism of Denaturation and the Unfolded State of the  $\alpha$ -Helical Membrane-Associated Protein Mistic. (2013) doi:10.1021/ja408644f.
2. Ganguly, P., Boserman, P., van der Vegt, N. F. A. & Shea, J.-E. Trimethylamine N-oxide Counteracts Urea Denaturation by Inhibiting Protein–Urea Preferential Interaction. (2017) doi:10.1021/jacs.7b11695.
3. Riddlestone, I. M., Kraft, A., Schaefer, J. & Krossing, I. Taming the Cationic Beast: Novel Developments in the Synthesis and Application of Weakly Coordinating Anions. *Angew. Chem. Int. Ed.* **57**, 13982–14024 (2018).
4. Lipping, L. *et al.* Superacidity of closo-Dodecaborate-Based Brønsted Acids: a DFT Study. (2015) doi:10.1021/jp506485x.
5. Karki, K., Gabel, D. & Roccatano, D. Structure and dynamics of dodecaborate clusters in water. *Inorg. Chem.* **51**, 4894–4896 (2012).
6. Jiang, Y. *et al.* Highly Structured Water Networks in Microhydrated Dodecaborate Clusters. *J. Phys. Chem. Lett.* **13**, 11787–11794 (2022).
7. Jiang, Y. *et al.* Unraveling hydridic-to-protonic dihydrogen bond predominance in monohydrated dodecaborate clusters. *Chem. Sci.* **13**, 9855–9860 (2022).
8. Bukovsky, E. V. *et al.* Comparison of the Coordination of B<sub>12</sub>F<sub>12</sub><sup>2−</sup>, B<sub>12</sub>Cl<sub>12</sub><sup>2−</sup>, and B<sub>12</sub>H<sub>12</sub><sup>2−</sup> to Na<sup>+</sup> in the Solid State: Crystal Structures and Thermal Behavior of Na<sub>2</sub>(B<sub>12</sub>F<sub>12</sub>), Na<sub>2</sub>(H<sub>2</sub>O)<sub>4</sub>(B<sub>12</sub>F<sub>12</sub>), Na<sub>2</sub>(B<sub>12</sub>Cl<sub>12</sub>), and Na<sub>2</sub>(H<sub>2</sub>O)<sub>6</sub>(B<sub>12</sub>Cl<sub>12</sub>). (2017) doi:10.1021/acs.inorgchem.6b02920.
9. Assaf, K. I. *et al.* Water Structure Recovery in Chaotropic Anion Recognition: High-Affinity Binding of Dodecaborate Clusters to  $\gamma$ -Cyclodextrin. *Angew. Chem. Int. Ed.* **54**, 6852–6856 (2015).
10. Goszczyński, T. M., Fink, K., Kowalski, K., Leśnikowski, Z. J. & Boratyński, J. Interactions of Boron Clusters and their Derivatives with Serum Albumin. *Sci. Rep.* **7**, 9800 (2017).



11. Murray, E. *et al.* Simple, Scalable Proteomic Imaging for High-Dimensional Profiling of Intact Systems. *Cell* **163**, 1500–1514 (2015).
12. Yau, C. N. *et al.* Principles of deep immunohistochemistry for 3D histology. *Cell Rep Methods* **3**, 100458 (2023).
13. Lai, H. M. *et al.* Antibody stabilization for thermally accelerated deep immunostaining. *Nat. Methods* **19**, 1137–1146 (2022).
14. Assaf, K. I. & Nau, W. M. The Chaotropic Effect as an Assembly Motif in Chemistry. *Angew. Chem. Int. Ed Engl.* **57**, 13968–13981 (2018)
